# Supplementary material for: Identification and Characterization of Glycine- and Arginine-Rich Motifs in Proteins by a Novel GAR Motif Finder Program
Source: Genes (Basel). 2023 Jan 27;14(2):330. doi: 10.3390/genes14020330 (PMC9957100; doi:10.3390/genes14020330)
Supplement: Supplementary file 1 [file genes-14-00330-s001.zip]

Archive with 6 entries (6 files):
- Supplementary Figure S1.pdf
- Supplementary File S1.txt
- Supplementary File S2.txt
- Supplementary Table S1.csv
- Supplementary Table S2.csv
- Supplementary Table S3.xlsx
