# Supplementary material for: Identification and Characterization of Glycine- and Arginine-Rich Motifs in Proteins by a Novel GAR Motif Finder Program
Source: Genes (Basel). 2023 Jan 27;14(2):330. doi: 10.3390/genes14020330 (PMC9957100; doi:10.3390/genes14020330)
Supplement: Supplementary file 1 [file genes-14-00330-s001.zip › Supplementary File S1.txt]

===================================
>NP_998167.1 rRNA 2'-O-methyltransferase fibrillarin [Danio rerio]

GAR motif found
position: 7..38, 50..79
GAR-Motif Pattern: 
1: PRGGGGRGGFGGRGRGGGDRGGRGGFRGGRGG
RG:  1
RGG: 7
Else: 
D     1
F     2
P     1

GAR-Motif Percentage: 10.094637223974763 %
Gs/Rs: 2.5
G%: 62.5%
R%: 25.0%
Non-GAR AA%: 12.5%

2: GGFRGRGGGRGTPRGRGGGRGGGRGGFRGG
RG:  3
RGG: 5
Else: 
F     2
P     1
T     1

GAR-Motif Percentage: 9.46372239747634 %
Gs/Rs: 2.25
G%: 60.0%
R%: 26.666666666666668%
Non-GAR AA%: 13.333333333333334%


please check your sequence: 
MRPGFS[PRGGGGRGGFGGRGRGGGDRGGRGGFRGGRGG]FGGGFKSPGGE[GGFRGRGG
GRGTPRGRGGGRGGGRGGFRGG]AKVTVEPHRHEGVFICRGKEDALVTKNMVIGESVYGE
KRINVEEGETKIEYRAWNPFRSKLAAAILGGIDQIHIKPGVKVMYLGAASGTTVSHVSDI
VGPEGLVYAVEFSHRSGRDLLNVAKKRTNIIPIIEDARHPHKYRMLVGMVDVIFADVAQP
DQTRIVALNAHNFLKNGGHFVISIKANCIDSTAAPEAVFASEVKKMSAENMKPQEQLTLE
PYERDHAVVVGIYRPPPKGKK

===================================
>NP_989101.1 rRNA 2'-O-methyltransferase fibrillarin [Xenopus tropicalis]

GAR motif found
position: 7..83
GAR-Motif Pattern: 
1: PRGGRGGYGDRGGFGDRGGGRGRGGFRGRGGGGDRGGFGGRGGFGGRGGFGDRGGFRGGFKSPGRGGPRGGRGGRGG
RG:  2
RGG: 15
Else: 
D     4
F     7
K     1
P     3
S     1
Y     1

GAR-Motif Percentage: 23.692307692307693 %
Gs/Rs: 2.5294117647058822
G%: 55.84415584415584%
R%: 22.07792207792208%
Non-GAR AA%: 22.07792207792208%


please check your sequence: 
MRPGFS[PRGGRGGYGDRGGFGDRGGGRGRGGFRGRGGGGDRGGFGGRGGFGGRGGFGDR
GGFRGGFKSPGRGGPRGGRGGRGG]FGAGRKVIVEPHRHEGIFICRGKEDALVTKNLVPG
ESVYGEKRISVEDGEVKTEYRAWNPFRSKIAAAILGGVDQIHIKPGAKVLYLGAASGTTV
SHVSDVVGPEGLVYAVEFSHRSGRDLINVAKKRTNIIPVIEDARHPHKYRMLVGMVDVVF
ADVAQPDQTRIVALNAHNFLKNGGHFVISIKANCIDSTAAPEAVFAAEVKKMQQENMKPQ
EQLTLEPYERDHAVVVGIYRPPAKQKK

===================================
>XP_003224982.1 PREDICTED: rRNA 2'-O-methyltransferase fibrillarin [Anolis carolinensis]

GAR motif found
position: 7..73
GAR-Motif Pattern: 
1: PRGGRGDRGGRGGFGDRGRGGFRGGRGGGFNSPGRGGGPFRGGRGGSRGRGGPRGGGRGGRGGFRGG
RG:  3
RGG: 14
Else: 
D     2
F     5
N     1
P     4
S     2

GAR-Motif Percentage: 21.543408360128616 %
Gs/Rs: 2.1176470588235294
G%: 53.73134328358209%
R%: 25.37313432835821%
Non-GAR AA%: 20.895522388059703%


please check your sequence: 
MRPGFS[PRGGRGDRGGRGGFGDRGRGGFRGGRGGGFNSPGRGGGPFRGGRGGSRGRGGP
RGGGRGGRGGFRGG]KKVTVEPHRHEGVFICRGKEDALVTKNLVPGESVYGEKRISVEDG
EIKVEYRAWNPFRSKLAAAILGGIDQIHIKPGAKVLYLGAASGTTVSHVSDIVGPEGLVY
AVEFSHRSGRDLINVAKKRTNIIPVIEDARHPHKYRMLIGMVDVIFADVAQPDQSRIVAL
NAHNFLKNGGHFVISIKANCVDSTAAPEAVFASEVKKMQQENMKPQEQLTLEPYERDHAV
VVGIYRPAPKQKK

===================================
>NP_032017.2 rRNA 2'-O-methyltransferase fibrillarin [Mus musculus]

GAR motif found
position: 7..85
GAR-Motif Pattern: 
1: PRGGGFGGRGGFGDRGGRGGGRGGRGGFGGGRGGFGGGGRGRGGGGGGFRGRGGGGGRGGGFQSGGNRGRGGGRGGKRG
RG:  4
RGG: 12
Else: 
D     1
F     6
K     1
N     1
P     1
Q     1
S     1

GAR-Motif Percentage: 24.159021406727827 %
Gs/Rs: 3.1875
G%: 64.55696202531645%
R%: 20.253164556962027%
Non-GAR AA%: 15.189873417721518%


please check your sequence: 
MKPGFS[PRGGGFGGRGGFGDRGGRGGGRGGRGGFGGGRGGFGGGGRGRGGGGGGFRGRG
GGGGRGGGFQSGGNRGRGGGRGGKRG]NQSGKNVMVEPHRHEGVFICRGKEDALVTKNLV
PGESVYGEKRVSISEGDDKIEYRAWNPFRSKLAAAILGGVDQIHIKPGAKVLYLGAASGT
TVSHVSDIVGPDGLVYAVEFSHRSGRDLINLAKKRTNIIPVIEDARHPHKYRMLIAMVDV
IFADVAQPDQTRIVALNAHTFLRNGGHFVISIKANCIDSTASAEAVFASEVKKMQQENMK
PQEQLTLEPYERDHAVVVGVYRPPPKVKN

===================================
>NP_001427.2 rRNA 2'-O-methyltransferase fibrillarin [Homo sapiens]

GAR motif found
position: 7..79
GAR-Motif Pattern: 
1: PRGGGFGGRGGFGDRGGRGGRGGFGGGRGRGGGFRGRGRGGGGGGGGGGGGGRGGGGFHSGGNRGRGRGGKRG
RG:  6
RGG: 9
Else: 
D     1
F     5
H     1
K     1
N     1
P     1
S     1

GAR-Motif Percentage: 22.741433021806852 %
Gs/Rs: 3.1333333333333333
G%: 64.38356164383562%
R%: 20.54794520547945%
Non-GAR AA%: 15.068493150684931%


please check your sequence: 
MKPGFS[PRGGGFGGRGGFGDRGGRGGRGGFGGGRGRGGGFRGRGRGGGGGGGGGGGGGR
GGGGFHSGGNRGRGRGGKRG]NQSGKNVMVEPHRHEGVFICRGKEDALVTKNLVPGESVY
GEKRVSISEGDDKIEYRAWNPFRSKLAAAILGGVDQIHIKPGAKVLYLGAASGTTVSHVS
DIVGPDGLVYAVEFSHRSGRDLINLAKKRTNIIPVIEDARHPHKYRMLIAMVDVIFADVA
QPDQTRIVALNAHTFLRNGGHFVISIKANCIDSTASAEAVFASEVKKMQQENMKPQEQLT
LEPYERDHAVVVGVYRPPPKVKN

===================================
>NP_001070120.2 nucleolin [Danio rerio]

GAR motif found
position: 541..548, 633..691
GAR-Motif Pattern: 
1: ERGGGGRG
RG:  1
RGG: 1
Else: 
E     1

GAR-Motif Percentage: 1.1347517730496455 %
Gs/Rs: 2.5
G%: 62.5%
R%: 25.0%
Non-GAR AA%: 12.5%

2: GGRGGFGGGRGGFGGRGGGRGGFGGRGGGGRGGGFRGGRGGRGGGGGFRGGRGGGGRGG
RG:  0
RGG: 12
Else: 
F     5

GAR-Motif Percentage: 8.368794326241135 %
Gs/Rs: 3.5
G%: 71.1864406779661%
R%: 20.338983050847457%
Non-GAR AA%: 8.474576271186441%


please check your sequence: 
MVKLAKAAKKDAPPKKKAPPPPKEVEEESSEEDSDDDEEEEAPPVKAVAKKNAAPVKAVK
NGKAAAKQESEDEDDDDEDDESEEEAPPPKKAAKAPAKAAAPAKKAAPAEESSEEDDDDD
DDDESEEEAPPPKKAPAKATPAKATPAKKAAPVKKAAPAEESEDDDDDEDESEEEEAPPP
KKAAAAAKPAAKAPAAKEESDEEEDDDEEEDDSEEEEMDTTPAPKAKKAGMVKAKEESEE
EDDDDEEDDDDEEEEETPATPAKRKAETKKEKGTPPAKKAKTDGEGFSLFLGNLNNNKDF
DELKSAISKFFSKEGLEIQDVRLGGTKKFGYVDFASEEELQKALELNGKKLLGQPVKLDK
ARSKENSQENKKERDARTLFVKNLPYSITQDDLREIFDQAVDIRVPMGNTGTSRGIAYIE
FKTEAIAEKALEEAQGSDVQGRSIIVDFTGDKSRQGGRGAPSASKVLVVNNLAFSASEDS
LQSVFEKAVSIRIPQNNGRPKGYAFVEFENVEDSKEALENCNNTDIEGRSIRLEYSQNDR
[ERGGGGRG]NSGPTKTLFVKGLSDDTTDQTLKDSFDGAIAARIATDRDTGSSKGFGFVD
FDNEQDCKAAKEAMDDGEIDGNKVTLDYAKPKGE[GGRGGFGGGRGGFGGRGGGRGGFGG
RGGGGRGGGFRGGRGGRGGGGGFRGGRGGGGRGG]FGDRPQGKKIKFDD

===================================
>NP_001359066.1 nucleolin [Xenopus laevis]

GAR motif found
position: 583..642
GAR-Motif Pattern: 
1: QRGGRGGFGRGGGFRGGRGGRGGGGGRGFGGRGGGRGRGGFGGRGGGGFRGGQGGGFRGG
RG:  2
RGG: 11
Else: 
F     6
Q     2

GAR-Motif Percentage: 9.216589861751151 %
Gs/Rs: 3.0
G%: 65.0%
R%: 21.666666666666668%
Non-GAR AA%: 13.333333333333334%


please check your sequence: 
MVKLAKGAKTQAKPKKAAPPPPKDMEDSEEEEDMEEDDSSDEEVEVPVKKTPAKKTATPA
KATPGKAATPGKKGATPAKNGKQAKKQESEEEEDDSDEEAEDQKPIKNKPVAKKAVAKKE
ESEEDDDDEDESEEEKAVAKKPTPAKKPAGKKQESEEEDDEESEDEPMEVAPALKGKKTA
QAAEEDDEEEDDDDEEDDDDEEEQQGSAKRKKEMPKTIPEAKKTKTDTASEGLSIFIGNL
NSTKEFDELKDALREFFSKKNLTIQDIRIGNSKKFGYVDFSSEEEVEKALKLTGKKILGT
EVKIEKAMAFDKNKTAENKKERDSRTLFVKNIPYSTTVEELQEIFENAKDIRIPTGKDGS
NKGIAYVEFSNEDEANKALEEKQGAEIEGRSIFVDFTGEKSQNSGNKKGPEGDSKVLVVN
NLSYSATEDSLREVFEKATSIRIPQNQGRAKGFAFIEFSSAEDAKDAMDSCNNTEIEGRS
IRLEFSQGGGPQGGGRGGSAQSKTLFVRGLSEDTTEETLKEAFDGSVNARIVTDRDTGAS
KGFGFVDFSTAEDAKAAKEAMEDGEIDGNKVTLDFAKPKGDS[QRGGRGGFGRGGGFRGG
RGGRGGGGGRGFGGRGGGRGRGGFGGRGGGGFRGGQGGGFRGG]QGKKMRFDD

===================================
>XP_003225545.1 PREDICTED: nucleolin [Anolis carolinensis]

GAR motif found
position: 634..681
GAR-Motif Pattern: 
1: GQRGGGGGGFGRGGRGGGGRGGGRGGFGRGGGRGFGGRGGGFRGGRGG
RG:  1
RGG: 9
Else: 
F     4
Q     1

GAR-Motif Percentage: 6.896551724137931 %
Gs/Rs: 3.3
G%: 68.75%
R%: 20.833333333333332%
Non-GAR AA%: 10.416666666666666%


please check your sequence: 
MVKLAKNVNKPPQKLKKMAALPAKEVDDSEEEDDSSEEEESSEEEMIPQKKAATPGKAAA
VTPNKKAAATPGKKATPAPTPAKKAAVTPAKKGAATPAKKTPVSAKGAKNGKNAKKEESE
DEEDEDEEDEDEDSEEEDESEEEVAVPVKKPTKVPAIAKKAAVTAKVAKQVAQDDDDEED
DDEDEDEEDESEDEPMEITPAKGKKAAVLAKPTLKKATPAKVAKEESEEDDDDEEDDEDD
EEDDDEEEEEEENVQETSGKRKKEMAKQKGTPDAKKQKTEAAFSVFLGNLNANKDFEELK
AGIRDFFTKKDIEVQDVRLGGSKKFGYVDFPSEAEMDKALKLNGKKLMGLELKLEKAKSR
ESIQENKKERDARTLFVKNLPFSVSKEDLQEEFDNAVEVRLVSRDGNSKGMAYIEFKSEA
EAEKTLEEKQGLEMSGRAIVIDYTGEKSQQDTRKGGKGGQSDSKTLVVNNLSYDATEESL
QEVFEKASAIRIPQNNQGRPKGFAFVDFATAEDAKEAMNSCNNTEIEGRAIRLEFSTQGG
QNRNQGRGGFSQQSKTLFVKGLSEDTTEETLRESFDGSVGARIVTDRETGSSKGFGFVDF
SSAEDAKAAKEAMEDGEIDGNKVTLDFAKPKGD[GQRGGGGGGFGRGGRGGGGRGGGRGG
FGRGGGRGFGGRGGGFRGGRGG]GGDHKPQGKKIKFDD

===================================
>NP_035010.3 nucleolin [Mus musculus]

GAR motif found
position: 651..693
GAR-Motif Pattern: 
1: GGRGGGRGGFGGRGGGRGGRGGFGGRGRGGFGGRGGFRGGRGG
RG:  1
RGG: 9
Else: 
F     4

GAR-Motif Percentage: 6.082036775106082 %
Gs/Rs: 2.9
G%: 67.44186046511628%
R%: 23.25581395348837%
Non-GAR AA%: 9.30232558139535%


please check your sequence: 
MVKLAKAGKTHGEAKKMAPPPKEVEEDSEDEEMSEDEDDSSGEEEVVIPQKKGKKATTTP
AKKVVVSQTKKAAVPTPAKKAAVTPGKKAVATPAKKNITPAKVIPTPGKKGAAQAKALVP
TPGKKGAATPAKGAKNGKNAKKEDSDEDEDEEDEDDSDEDEDDEEEDEFEPPIVKGVKPA
KAAPAAPASEDEEDDEDEDDEEDDDEEEEDDSEEEVMEITTAKGKKTPAKVVPMKAKSVA
EEEDDEEEDEDDEDEDDEEEDDEDDDEEEEEEEPVKAAPGKRKKEMTKQKEAPEAKKQKV
EGSEPTTPFNLFIGNLNPNKSVNELKFAISELFAKNDLAVVDVRTGTNRKFGYVDFESAE
DLEKALELTGLKVFGNEIKLEKPKGRDSKKVRAARTLLAKNLSFNITEDELKEVFEDAME
IRLVSQDGKSKGIAYIEFKSEADAEKNLEEKQGAEIDGRSVSLYYTGEKGQRQERTGKTS
TWSGESKTLVLSNLSYSATKETLEEVFEKATFIKVPQNPHGKPKGYAFIEFASFEDAKEA
LNSCNKMEIEGRTIRLELQGSNSRSQPSKTLFVKGLSEDTTEETLKESFEGSVRARIVTD
RETGSSKGFGFVDFNSEEDAKAAKEAMEDGEIDGNKVTLDWAKPKGEGGF[GGRGGGRGG
FGGRGGGRGGRGGFGGRGRGGFGGRGGFRGGRGG]GGDFKPQGKKTKFE

===================================
>NP_005372.2 nucleolin [Homo sapiens]

GAR motif found
position: 654..696
GAR-Motif Pattern: 
1: GGRGGGRGGFGGRGGGRGGRGGFGGRGRGGFGGRGGFRGGRGG
RG:  1
RGG: 9
Else: 
F     4

GAR-Motif Percentage: 6.056338028169014 %
Gs/Rs: 2.9
G%: 67.44186046511628%
R%: 23.25581395348837%
Non-GAR AA%: 9.30232558139535%


please check your sequence: 
MVKLAKAGKNQGDPKKMAPPPKEVEEDSEDEEMSEDEEDDSSGEEVVIPQKKGKKAAATS
AKKVVVSPTKKVAVATPAKKAAVTPGKKAAATPAKKTVTPAKAVTTPGKKGATPGKALVA
TPGKKGAAIPAKGAKNGKNAKKEDSDEEEDDDSEEDEEDDEDEDEDEDEIEPAAMKAAAA
APASEDEDDEDDEDDEDDDDDEEDDSEEEAMETTPAKGKKAAKVVPVKAKNVAEDEDEEE
DDEDEDDDDDEDDEDDDDEDDEEEEEEEEEEPVKEAPGKRKKEMAKQKAAPEAKKQKVEG
TEPTTAFNLFVGNLNFNKSAPELKTGISDVFAKNDLAVVDVRIGMTRKFGYVDFESAEDL
EKALELTGLKVFGNEIKLEKPKGKDSKKERDARTLLAKNLPYKVTQDELKEVFEDAAEIR
LVSKDGKSKGIAYIEFKTEADAEKTFEEKQGTEIDGRSISLYYTGEKGQNQDYRGGKNST
WSGESKTLVLSNLSYSATEETLQEVFEKATFIKVPQNQNGKSKGYAFIEFASFEDAKEAL
NSCNKREIEGRAIRLELQGPRGSPNARSQPSKTLFVKGLSEDTTEETLKESFDGSVRARI
VTDRETGSSKGFGFVDFNSEEDAKAAKEAMEDGEIDGNKVTLDWAKPKGEGGF[GGRGGG
RGGFGGRGGGRGGRGGFGGRGRGGFGGRGGFRGGRGG]GGDHKPQGKKTKFE

===================================
>NP_957269.2 H/ACA ribonucleoprotein complex subunit 1 [Danio rerio]

GAR motif found
position: 3..51, 162..224
GAR-Motif Pattern: 
1: FRGGGGGRGGGFNRGGGGGRGGGFGGGRGGGFGGGRGGGFGGGRGGRGG
RG:  0
RGG: 8
Else: 
F     5
N     1

GAR-Motif Percentage: 21.77777777777778 %
Gs/Rs: 4.375
G%: 71.42857142857143%
R%: 16.3265306122449%
Non-GAR AA%: 12.244897959183673%

2: PRGGRGGGGRGGRGGGFRGGRGANGGGRGGFGGRGGGFGGRGGGGGGFRGGRGGGGGRGFRGG
RG:  2
RGG: 11
Else: 
A     1
F     5
N     1
P     1

GAR-Motif Percentage: 28.0 %
Gs/Rs: 3.230769230769231
G%: 66.66666666666667%
R%: 20.634920634920636%
Non-GAR AA%: 12.698412698412698%


please check your sequence: 
MS[FRGGGGGRGGGFNRGGGGGRGGGFGGGRGGGFGGGRGGGFGGGRGGRGG]FNRNQDY
GPPEYVVALGEFMHPCEDEIVCKCVTEENKVPYFNAPVYLENKEQIGKVDEIFGQLRDFY
FSVKLSDNMKASSFKKLQKFYIDPMKLLPLQRFLPRPPGEKGP[PRGGRGGGGRGGRGGG
FRGGRGANGGGRGGFGGRGGGFGGRGGGGGGFRGGRGGGGGRGFRGG]R

===================================
>NP_001011252.1 H/ACA ribonucleoprotein complex subunit 1 [Xenopus tropicalis]

GAR motif found
position: 3..54, 161..217
GAR-Motif Pattern: 
1: FRGRGGFNRGGGGGRGGGGFGGRGGGRGGYGQGGGRGGFGRGGGRGGFNRGG
RG:  1
RGG: 9
Else: 
F     5
N     2
Q     1
Y     1

GAR-Motif Percentage: 23.853211009174313 %
Gs/Rs: 3.3
G%: 63.46153846153846%
R%: 19.23076923076923%
Non-GAR AA%: 17.307692307692307%

2: PRGGGRGGGRGGGRGRGGGRGGGGGFRGGRGGGFGGGGGFRGSRGGGFRGGRGFRGG
RG:  3
RGG: 10
Else: 
F     5
P     1
S     1

GAR-Motif Percentage: 26.146788990825687 %
Gs/Rs: 2.8461538461538463
G%: 64.91228070175438%
R%: 22.80701754385965%
Non-GAR AA%: 12.280701754385966%


please check your sequence: 
MS[FRGRGGFNRGGGGGRGGGGFGGRGGGRGGYGQGGGRGGFGRGGGRGGFNRGG]YDQG
PPESVVEVGEFMHPCEDDVVCKCITQENRVPYFNAPIYLENKEQIGKVDEIFGQLRDFYF
SIKLSENMKASSFKKLQKFYIDPAKLLPLQRFLPRPPGEKGP[PRGGGRGGGRGGGRGRG
GGRGGGGGFRGGRGGGFGGGGGFRGSRGGGFRGGRGFRGG]R

===================================
>XP_008110322.1 PREDICTED: H/ACA ribonucleoprotein complex subunit 1 [Anolis carolinensis]

GAR motif found
position: 3..55, 162..212
GAR-Motif Pattern: 
1: FRGRGGGNRGGGFNRGGGFNRGGGGFNRGGFSRGGGRGGFGRGGGRGGFNRGG
RG:  1
RGG: 10
Else: 
F     7
N     5
S     1

GAR-Motif Percentage: 24.88262910798122 %
Gs/Rs: 2.6363636363636362
G%: 54.716981132075475%
R%: 20.754716981132077%
Non-GAR AA%: 24.528301886792452%

2: PRGGRGGRGGRGGGRGGGGRGGGGFRGGRGGGGFRGGRGGGGGGRGFRGRG
RG:  3
RGG: 10
Else: 
F     3
P     1

GAR-Motif Percentage: 23.943661971830984 %
Gs/Rs: 2.6153846153846154
G%: 66.66666666666667%
R%: 25.49019607843137%
Non-GAR AA%: 7.8431372549019605%


please check your sequence: 
MS[FRGRGGGNRGGGFNRGGGFNRGGGGFNRGGFSRGGGRGGFGRGGGRGGFNRGG]YDQ
GPPESVVILGEFMHPCEDDIVCKCITQESKVPYFNAPVYLENKEQIGKVDEIFGQIRDFY
FSVKLSDNMKASSFKKLQKFYIDPMKLLPLQRFLPRPPGEKGP[PRGGRGGRGGRGGGRG
GGGRGGGGFRGGRGGGGFRGGRGGGGGGRGFRGRG]R

===================================
>NP_080854.1 H/ACA ribonucleoprotein complex subunit 1 [Mus musculus]

GAR motif found
position: 3..68, 179..230
GAR-Motif Pattern: 
1: FRGGGRGGFNRGGGGGGFNRGGGSNNHFRGGGGGGGGSFRGGGGGGGGSFRGGGRGGFGRGGGRGG
RG:  0
RGG: 10
Else: 
F     7
H     1
N     4
S     3

GAR-Motif Percentage: 28.571428571428573 %
Gs/Rs: 4.1
G%: 62.121212121212125%
R%: 15.151515151515152%
Non-GAR AA%: 22.727272727272727%

2: PRGGGGGGRGGRGGGRGGGGRGGGRGGGFRGGRGGGGGFRGGRGGGGFRGRG
RG:  2
RGG: 10
Else: 
F     3
P     1

GAR-Motif Percentage: 22.51082251082251 %
Gs/Rs: 3.0
G%: 69.23076923076923%
R%: 23.076923076923077%
Non-GAR AA%: 7.6923076923076925%


please check your sequence: 
MS[FRGGGRGGFNRGGGGGGFNRGGGSNNHFRGGGGGGGGSFRGGGGGGGGSFRGGGRGG
FGRGGGRGG]FNKFQDQGPPERVVLLGEFMHPCEDDIVCKCTTEENKVPYFNAPVYLENK
EQVGKVDEIFGQLRDFYFSVKLSENMKASSFKKLQKFYIDPYKLLPLQRFLPRPPGEKGP
[PRGGGGGGRGGRGGGRGGGGRGGGRGGGFRGGRGGGGGFRGGRGGGGFRGRG]H

===================================
>NP_061856.1 H/ACA ribonucleoprotein complex subunit 1 [Homo sapiens]

GAR motif found
position: 3..57, 168..216
GAR-Motif Pattern: 
1: FRGGGRGGFNRGGGGGGFNRGGSSNHFRGGGGGGGGGNFRGGGRGGFGRGGGRGG
RG:  0
RGG: 9
Else: 
F     6
H     1
N     4
S     2

GAR-Motif Percentage: 25.34562211981567 %
Gs/Rs: 3.6666666666666665
G%: 60.0%
R%: 16.363636363636363%
Non-GAR AA%: 23.636363636363637%

2: PRGGGRGGRGGGRGGGGRGGGRGGGFRGGRGGGGGGFRGGRGGGFRGRG
RG:  2
RGG: 10
Else: 
F     3
P     1

GAR-Motif Percentage: 22.580645161290324 %
Gs/Rs: 2.75
G%: 67.34693877551021%
R%: 24.489795918367346%
Non-GAR AA%: 8.16326530612245%


please check your sequence: 
MS[FRGGGRGGFNRGGGGGGFNRGGSSNHFRGGGGGGGGGNFRGGGRGGFGRGGGRGG]F
NKGQDQGPPERVVLLGEFLHPCEDDIVCKCTTDENKVPYFNAPVYLENKEQIGKVDEIFG
QLRDFYFSVKLSENMKASSFKKLQKFYIDPYKLLPLQRFLPRPPGEKGP[PRGGGRGGRG
GGRGGGGRGGGRGGGFRGGRGGGGGGFRGGRGGGFRGRG]H

===================================
Total statistics
===================================
Number of Sequences: 15

Sequence with GAR-Motif: 15

Percentage: 100.0000%

RGG,RG,non-RGG-RG Counting
RG:  39
RGG: 210
Else: 
A     1
D     9
E     1
F     99
H     3
K     3
N     20
P     16
Q     5
S     12
T     1
Y     2
