# Supplementary material for: Identification and Characterization of Glycine- and Arginine-Rich Motifs in Proteins by a Novel GAR Motif Finder Program
Source: Genes (Basel). 2023 Jan 27;14(2):330. doi: 10.3390/genes14020330 (PMC9957100; doi:10.3390/genes14020330)
Supplement: Supplementary file 1 [file genes-14-00330-s001.zip › Supplementary Table S1.csv]

Accession number	Pattern	Position	RG	RGG	Else	Percentage	Gs/Rs in GAR	G%	R%	non-GR aa%
>NP_998167.1 rRNA 2'-O-methyltransferase fibrillarin [Danio rerio]	PRGGGGRGGFGGRGRGGGDRGGRGGFRGGRGG	7..38	1	7	{'P': 1, 'F': 2, 'D': 1}	10.094637223974763	2.5	62.5	25.0	12.5
	GGFRGRGGGRGTPRGRGGGRGGGRGGFRGG	50..79	3	5	{'F': 2, 'T': 1, 'P': 1}	9.46372239747634	2.25	60.0	26.666666666666668	13.333333333333334
>NP_989101.1 rRNA 2'-O-methyltransferase fibrillarin [Xenopus tropicalis]	PRGGRGGYGDRGGFGDRGGGRGRGGFRGRGGGGDRGGFGGRGGFGGRGGFGDRGGFRGGFKSPGRGGPRGGRGGRGG	7..83	2	15	{'P': 3, 'Y': 1, 'D': 4, 'F': 7, 'K': 1, 'S': 1}	23.692307692307693	2.5294117647058822	55.84415584415584	22.07792207792208	22.07792207792208
>XP_003224982.1 PREDICTED: rRNA 2'-O-methyltransferase fibrillarin [Anolis carolinensis]	PRGGRGDRGGRGGFGDRGRGGFRGGRGGGFNSPGRGGGPFRGGRGGSRGRGGPRGGGRGGRGGFRGG	7..73	3	14	{'P': 4, 'D': 2, 'F': 5, 'N': 1, 'S': 2}	21.543408360128616	2.1176470588235294	53.73134328358209	25.37313432835821	20.895522388059703
>NP_032017.2 rRNA 2'-O-methyltransferase fibrillarin [Mus musculus]	PRGGGFGGRGGFGDRGGRGGGRGGRGGFGGGRGGFGGGGRGRGGGGGGFRGRGGGGGRGGGFQSGGNRGRGGGRGGKRG	7..85	4	12	{'P': 1, 'F': 6, 'D': 1, 'Q': 1, 'S': 1, 'N': 1, 'K': 1}	24.159021406727827	3.1875	64.55696202531645	20.253164556962027	15.189873417721518
>NP_001427.2 rRNA 2'-O-methyltransferase fibrillarin [Homo sapiens]	PRGGGFGGRGGFGDRGGRGGRGGFGGGRGRGGGFRGRGRGGGGGGGGGGGGGRGGGGFHSGGNRGRGRGGKRG	7..79	6	9	{'P': 1, 'F': 5, 'D': 1, 'H': 1, 'S': 1, 'N': 1, 'K': 1}	22.741433021806852	3.1333333333333333	64.38356164383562	20.54794520547945	15.068493150684931
>NP_001070120.2 nucleolin [Danio rerio]	ERGGGGRG	541..548	1	1	{'E': 1}	1.1347517730496455	2.5	62.5	25.0	12.5
	GGRGGFGGGRGGFGGRGGGRGGFGGRGGGGRGGGFRGGRGGRGGGGGFRGGRGGGGRGG	633..691	0	12	{'F': 5}	8.368794326241135	3.5	71.1864406779661	20.338983050847457	8.474576271186441
>XP_031758857.1 nucleolin [Xenopus tropicalis]	QRGGRGGFGRGGGFRGGRGGRGGGGGRGGFGGRGGGRGRGGFGGRGGGGFRGG	641..693	1	11	{'Q': 1, 'F': 5}	7.5177304964539005	2.9166666666666665	66.0377358490566	22.641509433962263	11.320754716981131
>XP_003225545.1 PREDICTED: nucleolin [Anolis carolinensis]	GQRGGGGGGFGRGGRGGGGRGGGRGGFGRGGGRGFGGRGGGFRGGRGG	634..681	1	9	{'Q': 1, 'F': 4}	6.896551724137931	3.3	68.75	20.833333333333332	10.416666666666666
>NP_035010.3 nucleolin [Mus musculus]	GGRGGGRGGFGGRGGGRGGRGGFGGRGRGGFGGRGGFRGGRGG	651..693	1	9	{'F': 4}	6.082036775106082	2.9	67.44186046511628	23.25581395348837	9.30232558139535
>NP_005372.2 nucleolin [Homo sapiens]	GGRGGGRGGFGGRGGGRGGRGGFGGRGRGGFGGRGGFRGGRGG	654..696	1	9	{'F': 4}	6.056338028169014	2.9	67.44186046511628	23.25581395348837	9.30232558139535
>NP_957269.2 H/ACA ribonucleoprotein complex subunit 1 [Danio rerio]	FRGGGGGRGGGFNRGGGGGRGGGFGGGRGGGFGGGRGGGFGGGRGGRGG	3..51	0	8	{'F': 5, 'N': 1}	21.77777777777778	4.375	71.42857142857143	16.3265306122449	12.244897959183673
	PRGGRGGGGRGGRGGGFRGGRGANGGGRGGFGGRGGGFGGRGGGGGGFRGGRGGGGGRGFRGG	162..224	2	11	{'P': 1, 'F': 5, 'A': 1, 'N': 1}	28.0	3.230769230769231	66.66666666666667	20.634920634920636	12.698412698412698
>NP_001011252.1 H/ACA ribonucleoprotein complex subunit 1 [Xenopus tropicalis]	FRGRGGFNRGGGGGRGGGGFGGRGGGRGGYGQGGGRGGFGRGGGRGGFNRGG	3..54	1	9	{'F': 5, 'N': 2, 'Y': 1, 'Q': 1}	23.853211009174313	3.3	63.46153846153846	19.23076923076923	17.307692307692307
	PRGGGRGGGRGGGRGRGGGRGGGGGFRGGRGGGFGGGGGFRGSRGGGFRGGRGFRGG	161..217	3	10	{'P': 1, 'F': 5, 'S': 1}	26.146788990825687	2.8461538461538463	64.91228070175438	22.80701754385965	12.280701754385966
>XP_008110322.1 PREDICTED: H/ACA ribonucleoprotein complex subunit 1 [Anolis carolinensis]	FRGRGGGNRGGGFNRGGGFNRGGGGFNRGGFSRGGGRGGFGRGGGRGGFNRGG	3..55	1	10	{'F': 7, 'N': 5, 'S': 1}	24.88262910798122	2.6363636363636362	54.716981132075475	20.754716981132077	24.528301886792452
	PRGGRGGRGGRGGGRGGGGRGGGGFRGGRGGGGFRGGRGGGGGGRGFRGRG	162..212	3	10	{'P': 1, 'F': 3}	23.943661971830984	2.6153846153846154	66.66666666666667	25.49019607843137	7.8431372549019605
>NP_080854.1 H/ACA ribonucleoprotein complex subunit 1 [Mus musculus]	FRGGGRGGFNRGGGGGGFNRGGGSNNHFRGGGGGGGGSFRGGGGGGGGSFRGGGRGGFGRGGGRGG	3..68	0	10	{'F': 7, 'N': 4, 'S': 3, 'H': 1}	28.571428571428573	4.1	62.121212121212125	15.151515151515152	22.727272727272727
	PRGGGGGGRGGRGGGRGGGGRGGGRGGGFRGGRGGGGGFRGGRGGGGFRGRG	179..230	2	10	{'P': 1, 'F': 3}	22.51082251082251	3.0	69.23076923076923	23.076923076923077	7.6923076923076925
>NP_061856.1 H/ACA ribonucleoprotein complex subunit 1 [Homo sapiens]	FRGGGRGGFNRGGGGGGFNRGGSSNHFRGGGGGGGGGNFRGGGRGGFGRGGGRGG	3..57	0	9	{'F': 6, 'N': 4, 'S': 2, 'H': 1}	25.34562211981567	3.6666666666666665	60.0	16.363636363636363	23.636363636363637
	PRGGGRGGRGGGRGGGGRGGGRGGGFRGGRGGGGGGFRGGRGGGFRGRG	168..216	2	10	{'P': 1, 'F': 3}	22.580645161290324	2.75	67.34693877551021	24.489795918367346	8.16326530612245
