# Supplementary material for: Identification and Characterization of Glycine- and Arginine-Rich Motifs in Proteins by a Novel GAR Motif Finder Program
Source: Genes (Basel). 2023 Jan 27;14(2):330. doi: 10.3390/genes14020330 (PMC9957100; doi:10.3390/genes14020330)
Supplement: Supplementary file 1 [file genes-14-00330-s001.zip › Supplementary Table S2.csv]

Accession number	Pattern	Position	RG	RGG	Else	Percentage	Gs/Rs in GAR	G%	R%	non-GR aa%
>NP_001018077.1 plasminogen activator inhibitor 1 RNA-binding protein isoform 1 [Homo sapiens]	IRGRGGLGRGRGGRGRGMGRGDGFDSRG	162..189	6	2	{'I': 1, 'L': 1, 'M': 1, 'D': 2, 'F': 1, 'S': 1}	6.86	1.63	46.43	28.57	25.00
	GRGGRGGRGGRGRGGRPNRG	366..385	2	4	{'P': 1, 'N': 1}	4.90	1.57	55.00	35.00	10.00
>NP_004951.1 RNA-binding protein FUS isoform 1 [Homo sapiens]	DRGGRGRGG	212..220	1	2	{'D': 1}	1.71	1.67	55.56	33.33	11.11
	PRGRGGGRGGRGGMGGSDRGG	241..261	1	4	{'P': 1, 'M': 1, 'S': 1, 'D': 1}	3.99	2.40	57.14	23.81	19.05
	NRGGGNGRGGRGRGGPMGRGG	376..396	1	4	{'N': 2, 'P': 1, 'M': 1}	3.99	2.40	57.14	23.81	19.05
	RRGGRGGYDRGGYRGRGGDRGGFRGGRGGGDRGG	472..505	1	8	{'Y': 2, 'D': 3, 'F': 1}	6.46	1.80	52.94	29.41	17.65
>NP_006550.1 KH domain-containing, RNA-binding, signal transduction-associated protein 1 isoform 1 [Homo sapiens]	SRGGGGGSRGG	44..54	0	2	{'S': 2}	2.48	3.50	63.64	18.18	18.18
	SRGRGVPVRGRG	281..292	4	0	{'S': 1, 'V': 2, 'P': 1}	2.71	1.00	33.33	33.33	33.33
	PRGRGVGPPRGALVRGTPVRGAITRGATVTRG	301..332	7	0	{'P': 4, 'V': 4, 'A': 3, 'L': 1, 'T': 4, 'I': 1}	7.22	1.14	25.00	21.88	53.13
>NP_112420.1 heterogeneous nuclear ribonucleoprotein A1 isoform b [Homo sapiens]	DRGSGKKRG	139..147	2	0	{'D': 1, 'S': 1, 'K': 2}	2.42	1.50	33.33	22.22	44.44
	GRGGNFSGRGGFGGSRGG	217..234	0	3	{'N': 1, 'F': 2, 'S': 2}	4.84	3.33	55.56	16.67	27.78
>NP_002015.1 synaptic functional regulator FMR1 isoform ISO1 [Homo sapiens]	GRGSRPYRNRGHGRRG	470..485	3	0	{'S': 1, 'P': 1, 'Y': 1, 'N': 1, 'H': 1}	2.53	0.83	31.25	37.50	31.25
	RRGDGRRRGGGGRGQGGRGRGG	527..548	3	2	{'D': 1, 'Q': 1}	3.48	1.50	54.55	36.36	9.09
>sp|Q01844.1|EWS_HUMAN RecName: Full=RNA-binding protein EWS; AltName: Full=EWS oncogene; AltName: Full=Ewing sarcoma breakpoint region 1 protein	NRGRGRGGFDRGGMSRGGRGGGRGGMGSAGERGG	299..332	2	6	{'N': 1, 'F': 1, 'D': 1, 'M': 2, 'S': 2, 'A': 1, 'E': 1}	5.18	2.13	50.00	23.53	26.47
	MRGGLPPREGRGMPPPLRGG	454..473	1	2	{'M': 2, 'L': 2, 'P': 5, 'E': 1}	3.05	1.50	30.00	20.00	50.00
	GGRGGDRGGFPPRGPRGSRG	488..507	3	2	{'D': 1, 'F': 1, 'P': 3, 'S': 1}	3.05	1.80	45.00	25.00	30.00
	GGDRGRGGPGGMRGGRGGLMDRGGPGGMFRGGRGGDRGGFRGGRGMDRGGFGGGRRGG	560..617	2	10	{'D': 4, 'P': 2, 'M': 4, 'L': 1, 'F': 3}	8.84	2.38	53.45	22.41	24.14
	GGRRGGRGG	630..638	0	2	{}	1.37	2.00	66.67	33.33	0.00
>NP_631961.1 TATA-binding protein-associated factor 2N isoform 1 [Homo sapiens]	NRGYGGSQGGGRGRGGYDKDGRG	174..196	3	1	{'N': 1, 'Y': 2, 'S': 1, 'Q': 1, 'D': 2, 'K': 1}	3.89	2.75	47.83	17.39	34.78
	MRGGGSGGGRRGRGGYRGRGGFQGRGG	325..351	2	4	{'M': 1, 'S': 1, 'Y': 1, 'F': 1, 'Q': 1}	4.56	2.14	55.56	25.93	18.52
	FRGRGYGGERGYRGRGGRGGDRGG	394..417	4	3	{'F': 1, 'Y': 2, 'E': 1, 'D': 1}	4.05	1.71	50.00	29.17	20.83
	GGDRGGGYGGDRGGGYGGDRGGGYGGDRGGYGGDRGGGYGGDRGGYGGDRGGYGGDRGGYGGDRGGYGGDRSRGGYGGDRGG	456..537	0	11	{'D': 11, 'Y': 10, 'S': 1}	13.85	4.00	58.54	14.63	26.83
	GGDRGGGYGGDRGG	559..572	0	2	{'D': 2, 'Y': 1}	2.36	4.50	64.29	14.29	21.43
>NP_077726.1 probable ATP-dependent RNA helicase DDX4 isoform 1 [Homo sapiens]	NRGFSKRGG	124..132	1	1	{'N': 1, 'F': 1, 'S': 1, 'K': 1}	1.24	1.50	33.33	22.22	44.44
	RRGGRGSFRGCRGG	146..159	2	2	{'S': 1, 'F': 1, 'C': 1}	1.93	1.20	42.86	35.71	21.43
>sp|Q8ND56.3|LS14A_HUMAN RecName: Full=Protein LSM14 homolog A; AltName: Full=Protein FAM61A; AltName: Full=Protein SCD6 homolog; AltName: Full=Putative alpha-synuclein-binding protein; Short=AlphaSNBP; AltName: Full=RNA-associated protein 55A; Short=hRAP55; Short=hRAP55A	RRGRGGHRGGRG	269..280	2	2	{'H': 1}	2.59	1.20	50.00	41.67	8.33
	NRGRGGYRGRGGLGFRGGRGRGGGRGGTFTAPRGFRGGFRGGRGG	403..447	4	8	{'N': 1, 'Y': 1, 'L': 1, 'F': 4, 'T': 2, 'A': 1, 'P': 1}	9.72	1.83	48.89	26.67	24.44
>NP_005745.1 ras GTPase-activating protein-binding protein 1 [Homo sapiens]	LRGPGGPRGGLGGGMRGPPRGG	428..449	2	2	{'L': 2, 'P': 4, 'M': 1}	4.72	2.75	50.00	18.18	31.82
>NP_005889.3 caprin-1 isoform 1 [Homo sapiens]	SRGVSRGGSRGARGLMNGYRGPANGFRGG	607..635	4	2	{'S': 3, 'V': 1, 'A': 2, 'L': 1, 'M': 1, 'N': 2, 'Y': 1, 'P': 1, 'F': 1}	4.09	1.67	34.48	20.69	44.83
	KRGSGQSGPRGAPRGRGGPPRPNRG	675..699	4	1	{'K': 1, 'S': 2, 'Q': 1, 'P': 5, 'A': 1, 'N': 1}	3.53	1.33	32.00	24.00	44.00
>NP_005078.2 fragile X mental retardation syndrome-related protein 1 isoform a [Homo sapiens]	GRGRGRRG	385..392	3	0	{}	1.29	1.00	50.00	50.00	0.00
	GGRGRSVSGGRGRGGPRGG	443..461	2	2	{'S': 2, 'V': 1, 'P': 1}	3.06	2.00	52.63	26.32	21.05
>NP_056422.2 chromatin target of PRMT1 protein isoform 1 [Homo sapiens]	ARGAIGGRGLPIIQRGLPRGGLRGG	96..120	3	2	{'A': 2, 'I': 3, 'L': 3, 'P': 2, 'Q': 1}	10.08	1.80	36.00	20.00	44.00
	LRGGMSLRGQNLLRGG	127..142	1	2	{'L': 4, 'M': 1, 'S': 1, 'Q': 1, 'N': 1}	6.45	1.67	31.25	18.75	50.00
	RRGGVRGRGGPGRGGLGRGAMGRGGIGGRGRGMIGRGRGGFGGRGRGRGRGRG	152..204	10	5	{'V': 1, 'P': 1, 'L': 1, 'A': 1, 'M': 2, 'I': 2, 'F': 1}	21.37	1.75	52.83	30.19	16.98
>NP_004851.2 fragile X mental retardation syndrome-related protein 2 [Homo sapiens]	GGRGRG	430..435	2	0	{}	0.89	2.00	66.67	33.33	0.00
	GGRGRG	486..491	2	0	{}	0.89	2.00	66.67	33.33	0.00
>NP_114032.2 heterogeneous nuclear ribonucleoprotein U isoform a [Homo sapiens]	NRGGGHRGRGGFNMRGGNFRGGAPGNRGGYNRRGNMPQRGG	701..741	2	6	{'N': 6, 'H': 1, 'F': 2, 'M': 2, 'A': 1, 'P': 2, 'Y': 1, 'Q': 1}	4.97	1.78	39.02	21.95	39.02
	GRGSYSNRGNYNRGGMPNRGNYNQNFRGRGNNRG	761..794	6	1	{'S': 2, 'Y': 3, 'N': 9, 'M': 1, 'P': 1, 'Q': 1, 'F': 1}	4.12	1.29	26.47	20.59	52.94
>NP_055542.1 histone-lysine N-methyltransferase 2B [Homo sapiens]	ARGRFPGRPRGAGGGGGRGGRG	16..37	3	1	{'A': 2, 'F': 1, 'P': 2}	0.81	1.83	50.00	27.27	22.73
	QRGRGRGRGRGWGPSRG	90..106	6	0	{'Q': 1, 'W': 1, 'P': 1, 'S': 1}	0.63	1.17	41.18	35.29	23.53
	QRGRAPRGRG	144..153	3	0	{'Q': 1, 'A': 1, 'P': 1}	0.37	0.75	30.00	40.00	30.00
	RRGGQSSRGGRGGRGRGRGG	280..299	2	4	{'Q': 1, 'S': 2}	0.74	1.43	50.00	35.00	15.00
