# Supplementary material for: Identification and Characterization of Glycine- and Arginine-Rich Motifs in Proteins by a Novel GAR Motif Finder Program
Source: Genes (Basel). 2023 Jan 27;14(2):330. doi: 10.3390/genes14020330 (PMC9957100; doi:10.3390/genes14020330)
Supplement: Supplementary file 1 [file genes-14-00330-s001.zip › Supplementary Table S3.xlsx]

## Sheet: 工作表1
Accession number	Pattern	Position	RG	RGG	Else	Percentage	Gs/Rs in GAR	G%	R%	non-GR aa%	isoforms
>XP_005258733.1 zinc finger CCCH domain-containing protein 4 isoform X3 [Homo sapiens]	SRGRGSRGRGRGYRGRGSRGGSRGRGMGRGSRGRGRG	199..235	13	1	{'S': 5, 'Y': 1, 'M': 1}	2.92028	1.14286	43.2432	37.8378	18.9189	11
	SRGRGLSRGRGRGSRGRGKGMGRGRGRGGSRGG	283..315	9	2	{'S': 4, 'L': 1, 'K': 1, 'M': 1}	2.60458	1.36364	45.4545	33.3333	21.2121
>XP_005258734.1 zinc finger CCCH domain-containing protein 4 isoform X4 [Homo sapiens]	SRGRGSRGRGRGYRGRGSRGGSRGRGMGRGSRGRGRG	194..230	13	1	{'S': 5, 'Y': 1, 'M': 1}	2.93185	1.14286	43.2432	37.8378	18.9189
	SRGRGLSRGRGRGSRGRGKGMGRGRGRGGSRGG	278..310	9	2	{'S': 4, 'L': 1, 'K': 1, 'M': 1}	2.6149	1.36364	45.4545	33.3333	21.2121
>XP_005258735.1 zinc finger CCCH domain-containing protein 4 isoform X6 [Homo sapiens]	SRGRGSRGRGRGYRGRGSRGGSRGRGMGRGSRGRGRG	186..222	13	1	{'S': 5, 'Y': 1, 'M': 1}	2.95056	1.14286	43.2432	37.8378	18.9189
	SRGRGLSRGRGRGSRGRGKGMGRGRGRGGSRGG	270..302	9	2	{'S': 4, 'L': 1, 'K': 1, 'M': 1}	2.63158	1.36364	45.4545	33.3333	21.2121
>XP_006723176.1 zinc finger CCCH domain-containing protein 4 isoform X1 [Homo sapiens]	SRGRGSRGRGRGYRGRGSRGGSRGRGMGRGSRGRGRG	235..271	13	1	{'S': 5, 'Y': 1, 'M': 1}	2.8396	1.14286	43.2432	37.8378	18.9189
	SRGRGLSRGRGRGSRGRGKGMGRGRGRGGSRGG	319..351	9	2	{'S': 4, 'L': 1, 'K': 1, 'M': 1}	2.53262	1.36364	45.4545	33.3333	21.2121
>XP_011524970.1 zinc finger CCCH domain-containing protein 4 isoform X4 [Homo sapiens]	SRGRGSRGRGRGYRGRGSRGGSRGRGMGRGSRGRGRG	194..230	13	1	{'S': 5, 'Y': 1, 'M': 1}	2.93185	1.14286	43.2432	37.8378	18.9189
	SRGRGLSRGRGRGSRGRGKGMGRGRGRGGSRGG	278..310	9	2	{'S': 4, 'L': 1, 'K': 1, 'M': 1}	2.6149	1.36364	45.4545	33.3333	21.2121
>XP_011524971.1 zinc finger CCCH domain-containing protein 4 isoform X5 [Homo sapiens]	SRGRGSRGRGRGYRGRGSRGGSRGRGMGRGSRGRGRG	189..225	13	1	{'S': 5, 'Y': 1, 'M': 1}	2.94352	1.14286	43.2432	37.8378	18.9189
	SRGRGLSRGRGRGSRGRGKGMGRGRGRGGSRGG	273..305	9	2	{'S': 4, 'L': 1, 'K': 1, 'M': 1}	2.6253	1.36364	45.4545	33.3333	21.2121
>XP_011524972.1 zinc finger CCCH domain-containing protein 4 isoform X7 [Homo sapiens]	SRGRGSRGRGRGYRGRGSRGGSRGRGMGRGSRGRGRG	185..221	13	1	{'S': 5, 'Y': 1, 'M': 1}	2.95291	1.14286	43.2432	37.8378	18.9189
	SRGRGLSRGRGRGSRGRGKGMGRGRGRGGSRGG	269..301	9	2	{'S': 4, 'L': 1, 'K': 1, 'M': 1}	2.63368	1.36364	45.4545	33.3333	21.2121
>XP_016882018.1 zinc finger CCCH domain-containing protein 4 isoform X2 [Homo sapiens]	SRGRGSRGRGRGYRGRGSRGGSRGRGMGRGSRGRGRG	222..258	13	1	{'S': 5, 'Y': 1, 'M': 1}	2.86822	1.14286	43.2432	37.8378	18.9189
	SRGRGLSRGRGRGSRGRGKGMGRGRGRGGSRGG	306..338	9	2	{'S': 4, 'L': 1, 'K': 1, 'M': 1}	2.55814	1.36364	45.4545	33.3333	21.2121
>XP_016882019.1 zinc finger CCCH domain-containing protein 4 isoform X8 [Homo sapiens]	SRGRGSRGRGRGYRGRGSRGGSRGRGMGRGSRGRGRG	235..271	13	1	{'S': 5, 'Y': 1, 'M': 1}	3.03527	1.14286	43.2432	37.8378	18.9189
	SRGRGLSRGRGRGSRGRGKGMGRGRGRGGSRGG	319..351	9	2	{'S': 4, 'L': 1, 'K': 1, 'M': 1}	2.70714	1.36364	45.4545	33.3333	21.2121
>NP_055983.1 zinc finger CCCH domain-containing protein 4 [Homo sapiens]	SRGRGSRGRGRGYRGRGSRGGSRGRGMGRGSRGRGRG	235..271	13	1	{'S': 5, 'Y': 1, 'M': 1}	2.8396	1.14286	43.2432	37.8378	18.9189
	SRGRGLSRGRGRGSRGRGKGMGRGRGRGGSRGG	319..351	9	2	{'S': 4, 'L': 1, 'K': 1, 'M': 1}	2.53262	1.36364	45.4545	33.3333	21.2121
>XP_016882020.1 zinc finger CCCH domain-containing protein 4 isoform X9 [Homo sapiens]	SRGRGLSRGRGRGSRGRGKGMGRGRGRGGSRGG	22..54	9	2	{'S': 4, 'L': 1, 'K': 1, 'M': 1}	3.28032	1.36364	45.4545	33.3333	21.2121
>NP_003918.1 methyl-CpG-binding domain protein 2 isoform 1 [Homo sapiens]	GARGGGRGRGRWKQAGRGGGVCGRGRGRGRGRGRGRGRGRGRG	53..95	12	2	{'A': 2, 'W': 1, 'K': 1, 'Q': 1, 'V': 1, 'C': 1}	10.4623	1.4	48.8372	34.8837	16.2791	2
>NP_056647.1 methyl-CpG-binding domain protein 2 testis-specific isoform [Homo sapiens]	GARGGGRGRGRWKQAGRGGGVCGRGRGRGRGRGRGRGRGRGRG	53..95	12	2	{'A': 2, 'W': 1, 'K': 1, 'Q': 1, 'V': 1, 'C': 1}	14.2384	1.4	48.8372	34.8837	16.2791
>NP_001095867.1 heterogeneous nuclear ribonucleoprotein R isoform 4 [Homo sapiens]	IRGRGRGGGRGG	345..356	2	2	{'I': 1}	2.25564	1.75	58.3333	33.3333	8.33333	17
	VRGRGGGRGGRGAPPPPRGRGAPPPRGRAGYSQRGAPLGPPRGSRGGRGGPAQQQRGRGSRGSRGNRGG	398..466	11	5	{'V': 1, 'A': 5, 'P': 11, 'Y': 1, 'S': 4, 'Q': 4, 'L': 1, 'N': 1}	12.9699	1.41176	34.7826	24.6377	40.5797
>NP_001095868.1 heterogeneous nuclear ribonucleoprotein R isoform 1 [Homo sapiens]	IRGRGRGGGRGG	449..460	2	2	{'I': 1}	1.88679	1.75	58.3333	33.3333	8.33333
	VRGRGGGRGGRGAPPPPRGRGAPPPRGRAGYSQRGAPLGPPRGSRGGRGGPAQQQRGRGSRGSRGNRGG	502..570	11	5	{'V': 1, 'A': 5, 'P': 11, 'Y': 1, 'S': 4, 'Q': 4, 'L': 1, 'N': 1}	10.8491	1.41176	34.7826	24.6377	40.5797
>NP_001095869.1 heterogeneous nuclear ribonucleoprotein R isoform 3 [Homo sapiens]	IRGRGRGGGRGG	348..359	2	2	{'I': 1}	2.24299	1.75	58.3333	33.3333	8.33333
	VRGRGGGRGGRGAPPPPRGRGAPPPRGRAGYSQRGAPLGPPRGSRGGRGGPAQQQRGRGSRGSRGNRGG	401..469	11	5	{'V': 1, 'A': 5, 'P': 11, 'Y': 1, 'S': 4, 'Q': 4, 'L': 1, 'N': 1}	12.8972	1.41176	34.7826	24.6377	40.5797
>NP_001284549.1 heterogeneous nuclear ribonucleoprotein R isoform 5 [Homo sapiens]	IRGRGRGGGRGG	408..419	2	2	{'I': 1}	2.01681	1.75	58.3333	33.3333	8.33333
	VRGRGGGRGGRGAPPPPRGRGAPPPRGRAGYSQRGAPLGPPRGSRGGRGGPAQQQRGRGSRGSRGNRGG	461..529	11	5	{'V': 1, 'A': 5, 'P': 11, 'Y': 1, 'S': 4, 'Q': 4, 'L': 1, 'N': 1}	11.5966	1.41176	34.7826	24.6377	40.5797
>NP_001284550.1 heterogeneous nuclear ribonucleoprotein R isoform 7 [Homo sapiens]	IRGRGRGGGRGG	286..297	2	2	{'I': 1}	2.537	1.75	58.3333	33.3333	8.33333
	VRGRGGGRGGRGAPPPPRGRGAPPPRGRAGYSQRGAPLGPPRGSRGGRGGPAQQQRGRGSRGSRGNRGG	339..407	11	5	{'V': 1, 'A': 5, 'P': 11, 'Y': 1, 'S': 4, 'Q': 4, 'L': 1, 'N': 1}	14.5877	1.41176	34.7826	24.6377	40.5797
>NP_001284551.1 heterogeneous nuclear ribonucleoprotein R isoform 6 [Homo sapiens]	IRGRGRGGGRGG	307..318	2	2	{'I': 1}	2.42915	1.75	58.3333	33.3333	8.33333
	VRGRGGGRGGRGAPPPPRGRGAPPPRGRAGYSQRGAPLGPPRGSRGGRGGPAQQQRGRGSRGSRGNRGG	360..428	11	5	{'V': 1, 'A': 5, 'P': 11, 'Y': 1, 'S': 4, 'Q': 4, 'L': 1, 'N': 1}	13.9676	1.41176	34.7826	24.6377	40.5797
>NP_005817.1 heterogeneous nuclear ribonucleoprotein R isoform 2 [Homo sapiens]	IRGRGRGGGRGG	446..457	2	2	{'I': 1}	1.89573	1.75	58.3333	33.3333	8.33333
	VRGRGGGRGGRGAPPPPRGRGAPPPRGRAGYSQRGAPLGPPRGSRGGRGGPAQQQRGRGSRGSRGNRGG	499..567	11	5	{'V': 1, 'A': 5, 'P': 11, 'Y': 1, 'S': 4, 'Q': 4, 'L': 1, 'N': 1}	10.9005	1.41176	34.7826	24.6377	40.5797
>XP_005245768.1 heterogeneous nuclear ribonucleoprotein R isoform X2 [Homo sapiens]	IRGRGRGGGRGG	446..457	2	2	{'I': 1}	1.89573	1.75	58.3333	33.3333	8.33333
	VRGRGGGRGGRGAPPPPRGRGAPPPRGRAGYSQRGAPLGPPRGSRGGRGGPAQQQRGRGSRGSRGNRGG	499..567	11	5	{'V': 1, 'A': 5, 'P': 11, 'Y': 1, 'S': 4, 'Q': 4, 'L': 1, 'N': 1}	10.9005	1.41176	34.7826	24.6377	40.5797
>XP_011538773.1 heterogeneous nuclear ribonucleoprotein R isoform X1 [Homo sapiens]	IRGRGRGGGRGG	449..460	2	2	{'I': 1}	1.88679	1.75	58.3333	33.3333	8.33333
	VRGRGGGRGGRGAPPPPRGRGAPPPRGRAGYSQRGAPLGPPRGSRGGRGGPAQQQRGRGSRGSRGNRGG	502..570	11	5	{'V': 1, 'A': 5, 'P': 11, 'Y': 1, 'S': 4, 'Q': 4, 'L': 1, 'N': 1}	10.8491	1.41176	34.7826	24.6377	40.5797
>XP_011538774.1 heterogeneous nuclear ribonucleoprotein R isoform X3 [Homo sapiens]	IRGRGRGGGRGG	390..401	2	2	{'I': 1}	2.07972	1.75	58.3333	33.3333	8.33333
	VRGRGGGRGGRGAPPPPRGRGAPPPRGRAGYSQRGAPLGPPRGSRGGRGGPAQQQRGRGSRGSRGNRGG	443..511	11	5	{'V': 1, 'A': 5, 'P': 11, 'Y': 1, 'S': 4, 'Q': 4, 'L': 1, 'N': 1}	11.9584	1.41176	34.7826	24.6377	40.5797
>XP_011538776.1 heterogeneous nuclear ribonucleoprotein R isoform X4 [Homo sapiens]	IRGRGRGGGRGG	411..422	2	2	{'I': 1}	2.00669	1.75	58.3333	33.3333	8.33333
	VRGRGGGRGGRGAPPPPRGRGAPPPRGRAGYSQRGAPLGPPRGSRGGRGGPAQQQRGRGSRGSRGNRGG	464..532	11	5	{'V': 1, 'A': 5, 'P': 11, 'Y': 1, 'S': 4, 'Q': 4, 'L': 1, 'N': 1}	11.5385	1.41176	34.7826	24.6377	40.5797
>XP_011538777.1 heterogeneous nuclear ribonucleoprotein R isoform X4 [Homo sapiens]	IRGRGRGGGRGG	411..422	2	2	{'I': 1}	2.00669	1.75	58.3333	33.3333	8.33333
	VRGRGGGRGGRGAPPPPRGRGAPPPRGRAGYSQRGAPLGPPRGSRGGRGGPAQQQRGRGSRGSRGNRGG	464..532	11	5	{'V': 1, 'A': 5, 'P': 11, 'Y': 1, 'S': 4, 'Q': 4, 'L': 1, 'N': 1}	11.5385	1.41176	34.7826	24.6377	40.5797
>XP_011538778.1 heterogeneous nuclear ribonucleoprotein R isoform X7 [Homo sapiens]	IRGRGRGGGRGG	310..321	2	2	{'I': 1}	2.41449	1.75	58.3333	33.3333	8.33333
	VRGRGGGRGGRGAPPPPRGRGAPPPRGRAGYSQRGAPLGPPRGSRGGRGGPAQQQRGRGSRGSRGNRGG	363..431	11	5	{'V': 1, 'A': 5, 'P': 11, 'Y': 1, 'S': 4, 'Q': 4, 'L': 1, 'N': 1}	13.8833	1.41176	34.7826	24.6377	40.5797
>XP_011538779.1 heterogeneous nuclear ribonucleoprotein R isoform X8 [Homo sapiens]	IRGRGRGGGRGG	289..300	2	2	{'I': 1}	2.52101	1.75	58.3333	33.3333	8.33333
	VRGRGGGRGGRGAPPPPRGRGAPPPRGRAGYSQRGAPLGPPRGSRGGRGGPAQQQRGRGSRGSRGNRGG	342..410	11	5	{'V': 1, 'A': 5, 'P': 11, 'Y': 1, 'S': 4, 'Q': 4, 'L': 1, 'N': 1}	14.4958	1.41176	34.7826	24.6377	40.5797
>XP_016855497.1 heterogeneous nuclear ribonucleoprotein R isoform X5 [Homo sapiens]	IRGRGRGGGRGG	408..419	2	2	{'I': 1}	2.01681	1.75	58.3333	33.3333	8.33333
	VRGRGGGRGGRGAPPPPRGRGAPPPRGRAGYSQRGAPLGPPRGSRGGRGGPAQQQRGRGSRGSRGNRGG	461..529	11	5	{'V': 1, 'A': 5, 'P': 11, 'Y': 1, 'S': 4, 'Q': 4, 'L': 1, 'N': 1}	11.5966	1.41176	34.7826	24.6377	40.5797
>XP_016855498.1 heterogeneous nuclear ribonucleoprotein R isoform X6 [Homo sapiens]	IRGRGRGGGRGG	387..398	2	2	{'I': 1}	2.09059	1.75	58.3333	33.3333	8.33333
	VRGRGGGRGGRGAPPPPRGRGAPPPRGRAGYSQRGAPLGPPRGSRGGRGGPAQQQRGRGSRGSRGNRGG	440..508	11	5	{'V': 1, 'A': 5, 'P': 11, 'Y': 1, 'S': 4, 'Q': 4, 'L': 1, 'N': 1}	12.0209	1.41176	34.7826	24.6377	40.5797
>XP_016855499.1 heterogeneous nuclear ribonucleoprotein R isoform X6 [Homo sapiens]	IRGRGRGGGRGG	387..398	2	2	{'I': 1}	2.09059	1.75	58.3333	33.3333	8.33333		GRY-RBP; GRYRBP; hnRNP-Q; HNRNPQ; HNRPQ1;
	VRGRGGGRGGRGAPPPPRGRGAPPPRGRAGYSQRGAPLGPPRGSRGGRGGPAQQQRGRGSRGSRGNRGG	440..508	11	5	{'V': 1, 'A': 5, 'P': 11, 'Y': 1, 'S': 4, 'Q': 4, 'L': 1, 'N': 1}	12.0209	1.41176	34.7826	24.6377	40.5797		NSAP1; PP68
>NP_006363.4 heterogeneous nuclear ribonucleoprotein Q isoform 1 [Homo sapiens]	TRGRGRGGRGG	443..453	2	2	{'T': 1}	1.76565	1.5	54.5455	36.3636	9.09091	15
	GARGRGGRGARGAAPSRGRGAAPPRGRAGYSQRGGPGSARGVRGARGGAQQQRGRGVRGARGGRGG	494..559	11	5	{'A': 11, 'P': 4, 'S': 3, 'Y': 1, 'Q': 4, 'V': 2}	10.5939	1.41176	36.3636	25.7576	37.8788
>XP_005248692.1 heterogeneous nuclear ribonucleoprotein Q isoform X5 [Homo sapiens]	TRGRGRGGRGG	443..453	2	2	{'T': 1}	1.96078	1.5	54.5455	36.3636	9.09091
	GARGRGGRGARGAAPSRGRGAAPPRGRAGYSQRGGPGSARGVRGARGGAQQQRGRGG	494..550	9	4	{'A': 10, 'P': 4, 'S': 3, 'Y': 1, 'Q': 4, 'V': 1}	10.1604	1.42857	35.0877	24.5614	40.3509
>XP_005248693.1 heterogeneous nuclear ribonucleoprotein Q isoform X6 [Homo sapiens]	TRGRGRGGRGG	345..355	2	2	{'T': 1}	2.09524	1.5	54.5455	36.3636	9.09091
	GARGRGGRGARGAAPSRGRGAAPPRGRAGYSQRGGPGSARGVRGARGGAQQQRGRGVRGARGGRGG	396..461	11	5	{'A': 11, 'P': 4, 'S': 3, 'Y': 1, 'Q': 4, 'V': 2}	12.5714	1.41176	36.3636	25.7576	37.8788
>XP_005248694.1 heterogeneous nuclear ribonucleoprotein Q isoform X3 [Homo sapiens]	TRGRGRGGRGG	443..453	2	2	{'T': 1}	1.76565	1.5	54.5455	36.3636	9.09091
	GARGRGGRGARGAAPSRGRGAAPPRGRAGYSQRGGPGSARGVRGARGGAQQQRGRGVRGARGGRGG	494..559	11	5	{'A': 11, 'P': 4, 'S': 3, 'Y': 1, 'Q': 4, 'V': 2}	10.5939	1.41176	36.3636	25.7576	37.8788
>XP_016865665.1 heterogeneous nuclear ribonucleoprotein Q isoform X1 [Homo sapiens]	TRGRGRGGRGG	443..453	2	2	{'T': 1}	1.81818	1.5	54.5455	36.3636	9.09091
	GARGRGGRGARGAAPSRGRGAAPPRGRAGYSQRGGPGSARGVRGARGGAQQQRGRGVRGARGGRGG	494..559	11	5	{'A': 11, 'P': 4, 'S': 3, 'Y': 1, 'Q': 4, 'V': 2}	10.9091	1.41176	36.3636	25.7576	37.8788
	GKRGRG	598..603	2	0	{'K': 1}	0.991736	1.5	50	33.3333	16.6667
>XP_016865666.1 heterogeneous nuclear ribonucleoprotein Q isoform X2 [Homo sapiens]	TRGRGRGGRGG	443..453	2	2	{'T': 1}	1.82119	1.5	54.5455	36.3636	9.09091
	GARGRGGRGARGAAPSRGRGAAPPRGRAGYSQRGGPGSARGVRGARGGAQQQRGRGVRGARGGRGG	494..559	11	5	{'A': 11, 'P': 4, 'S': 3, 'Y': 1, 'Q': 4, 'V': 2}	10.9272	1.41176	36.3636	25.7576	37.8788
	GKRGRG	597..602	2	0	{'K': 1}	0.993377	1.5	50	33.3333	16.6667
>XP_016865667.1 heterogeneous nuclear ribonucleoprotein Q isoform X4 [Homo sapiens]	TRGRGRGGRGG	443..453	2	2	{'T': 1}	1.9573	1.5	54.5455	36.3636	9.09091
	GARGRGGRGARGAAPSRGRGAAPPRGRAGYSQRGGPGSARGVRGARGGAQQQRGRG	494..549	10	3	{'A': 10, 'P': 4, 'S': 3, 'Y': 1, 'Q': 4, 'V': 1}	9.96441	1.35714	33.9286	25	41.0714
>XP_016865668.1 heterogeneous nuclear ribonucleoprotein Q isoform X5 [Homo sapiens]	TRGRGRGGRGG	443..453	2	2	{'T': 1}	1.96078	1.5	54.5455	36.3636	9.09091
	GARGRGGRGARGAAPSRGRGAAPPRGRAGYSQRGGPGSARGVRGARGGAQQQRGRGG	494..550	9	4	{'A': 10, 'P': 4, 'S': 3, 'Y': 1, 'Q': 4, 'V': 1}	10.1604	1.42857	35.0877	24.5614	40.3509
>XP_016865669.1 heterogeneous nuclear ribonucleoprotein Q isoform X7 [Homo sapiens]	TRGRGRGGRGG	345..355	2	2	{'T': 1}	2.37581	1.5	54.5455	36.3636	9.09091
	GARGRGGRGARGAAPSRGRGAAPPRGRAGYSQRGGPGSARGVRGARGGAQQQRGRGG	396..452	9	4	{'A': 10, 'P': 4, 'S': 3, 'Y': 1, 'Q': 4, 'V': 1}	12.311	1.42857	35.0877	24.5614	40.3509
>NP_001153145.1 heterogeneous nuclear ribonucleoprotein Q isoform 2 [Homo sapiens]	TRGRGRGGRGG	345..355	2	2	{'T': 1}	2.37069	1.5	54.5455	36.3636	9.09091
	GARGRGGRGARGAAPSRGRGAAPPRGRAGYSQRGGPGSARGVRGARGGAQQQRGRG	396..451	10	3	{'A': 10, 'P': 4, 'S': 3, 'Y': 1, 'Q': 4, 'V': 1}	12.069	1.35714	33.9286	25	41.0714
>NP_001153146.1 heterogeneous nuclear ribonucleoprotein Q isoform 3 [Homo sapiens]	TRGRGRGGRGG	408..418	2	2	{'T': 1}	2.08729	1.5	54.5455	36.3636	9.09091
	GARGRGGRGARGAAPSRGRGAAPPRGRAGYSQRGGPGSARGVRGARGGAQQQRGRG	459..514	10	3	{'A': 10, 'P': 4, 'S': 3, 'Y': 1, 'Q': 4, 'V': 1}	10.6262	1.35714	33.9286	25	41.0714
>NP_001153147.1 heterogeneous nuclear ribonucleoprotein Q isoform 4 [Homo sapiens]	TRGRGRGGRGG	408..418	2	2	{'T': 1}	1.87075	1.5	54.5455	36.3636	9.09091
	GARGRGGRGARGAAPSRGRGAAPPRGRAGYSQRGGPGSARGVRGARGGAQQQRGRGVRGARGGRGG	459..524	11	5	{'A': 11, 'P': 4, 'S': 3, 'Y': 1, 'Q': 4, 'V': 2}	11.2245	1.41176	36.3636	25.7576	37.8788
>NP_001153148.1 heterogeneous nuclear ribonucleoprotein Q isoform 5 [Homo sapiens]	TRGRGRGGRGG	443..453	2	2	{'T': 1}	1.96078	1.5	54.5455	36.3636	9.09091
	GARGRGGRGARGAAPSRGRGAAPPRGRAGYSQRGGPGSARGVRGARGGAQQQRGRGG	494..550	9	4	{'A': 10, 'P': 4, 'S': 3, 'Y': 1, 'Q': 4, 'V': 1}	10.1604	1.42857	35.0877	24.5614	40.3509
>NP_001153149.1 heterogeneous nuclear ribonucleoprotein Q isoform 6 [Homo sapiens]	TRGRGRGGRGG	443..453	2	2	{'T': 1}	1.9573	1.5	54.5455	36.3636	9.09091
	GARGRGGRGARGAAPSRGRGAAPPRGRAGYSQRGGPGSARGVRGARGGAQQQRGRG	494..549	10	3	{'A': 10, 'P': 4, 'S': 3, 'Y': 1, 'Q': 4, 'V': 1}	9.96441	1.35714	33.9286	25	41.0714
>NP_001240700.1 heterogeneous nuclear ribonucleoprotein Q isoform 7 [Homo sapiens]	TRGRGRGGRGG	291..301	2	2	{'T': 1}	2.68293	1.5	54.5455	36.3636	9.09091
	GARGRGGRGARGAAPSRGRGAAPPRGRAGYSQRGGPGSARGVRGARGGAQQQRGRG	342..397	10	3	{'A': 10, 'P': 4, 'S': 3, 'Y': 1, 'Q': 4, 'V': 1}	13.6585	1.35714	33.9286	25	41.0714
>NP_003741.1 eukaryotic translation initiation factor 3 subunit A [Homo sapiens]	RRGMDDDRGPRRG	959..971	3	0	{'M': 1, 'D': 3, 'P': 1}	0.940666	0.6	23.0769	38.4615	38.4615	1
	RRGLDEDRG	1019..1027	2	0	{'L': 1, 'D': 2, 'E': 1}	0.65123	0.666667	22.2222	33.3333	44.4444
	DRGPRRGMDDDRGPRRGG	1035..1052	3	1	{'D': 4, 'P': 2, 'M': 1}	1.30246	0.833333	27.7778	33.3333	38.8889
	DRGPRRGLDDDRGPRRGMDDDRGPRRGMDDDRGPRRGMDDDRGPRRGLDDDRG	1066..1118	11	0	{'D': 16, 'P': 5, 'L': 2, 'M': 3}	3.83502	0.6875	20.7547	30.1887	49.0566
	RRGAEDDRG	1130..1138	2	0	{'A': 1, 'E': 1, 'D': 2}	0.65123	0.666667	22.2222	33.3333	44.4444
>NP_001296171.1 myosin XVB [Homo sapiens]	GRGPRGGRGG	99..108	1	2	{'P': 1}	0.327011	2	60	30	10	1
	GRGHGRGSKGRGRGKADEGRGHERGDEGRGRGKADEGRGHERGYEGRG	414..461	11	0	{'H': 3, 'S': 1, 'K': 3, 'A': 2, 'D': 3, 'E': 6, 'Y': 1}	1.56965	1.63636	37.5	22.9167	39.5833
	GRGHERG	468..474	2	0	{'H': 1, 'E': 1}	0.228908	1.5	42.8571	28.5714	28.5714
	SRGGRG	1218..1223	1	1	{'S': 1}	0.196207	1.5	50	33.3333	16.6667
	SRGLEAPPRG	1701..1710	2	0	{'S': 1, 'L': 1, 'E': 1, 'A': 1, 'P': 2}	0.327011	1	20	20	60
>NP_001193541.1 chromatin target of PRMT1 protein isoform 2 [Homo sapiens]	ARGAIGGRGLPIIQRGLPRGGLRGG	97..121	3	2	{'A': 2, 'I': 3, 'L': 3, 'P': 2, 'Q': 1}	10.0402	1.8	36	20	44	2
	LRGGMSLRGQNLLRGG	128..143	1	2	{'L': 4, 'M': 1, 'S': 1, 'Q': 1, 'N': 1}	6.4257	1.66667	31.25	18.75	50
	RRGGVRGRGGPGRGGLGRGAMGRGGIGGRGRGMIGRGRGGFGGRGRGRGRGRG	153..205	10	5	{'V': 1, 'P': 1, 'L': 1, 'A': 1, 'M': 2, 'I': 2, 'F': 1}	21.2851	1.75	52.8302	30.1887	16.9811
>NP_056422.2 chromatin target of PRMT1 protein isoform 1 [Homo sapiens]	ARGAIGGRGLPIIQRGLPRGGLRGG	96..120	3	2	{'A': 2, 'I': 3, 'L': 3, 'P': 2, 'Q': 1}	10.0806	1.8	36	20	44
	LRGGMSLRGQNLLRGG	127..142	1	2	{'L': 4, 'M': 1, 'S': 1, 'Q': 1, 'N': 1}	6.45161	1.66667	31.25	18.75	50
	RRGGVRGRGGPGRGGLGRGAMGRGGIGGRGRGMIGRGRGGFGGRGRGRGRGRG	152..204	10	5	{'V': 1, 'P': 1, 'L': 1, 'A': 1, 'M': 2, 'I': 2, 'F': 1}	21.371	1.75	52.8302	30.1887	16.9811
>NP_001273560.1 RNA-binding protein 26 isoform 1 [Homo sapiens]	KRGILSSGRGRGIHSRGRGAVHGRGRGRGRGRG	849..881	10	0	{'K': 1, 'I': 2, 'L': 1, 'S': 3, 'H': 2, 'A': 1, 'V': 1}	3.27056	1.2	36.3636	30.303	33.3333	40
>NP_001273561.1 RNA-binding protein 26 isoform 2 [Homo sapiens]	KRGILSSGRGRGIHSRGRGAVHGRGRGRGRGRG	823..855	10	0	{'K': 1, 'I': 2, 'L': 1, 'S': 3, 'H': 2, 'A': 1, 'V': 1}	3.35707	1.2	36.3636	30.303	33.3333
>NP_001353664.1 RNA-binding protein 26 isoform 4 [Homo sapiens]	KRGILSSGRGRGIHSRGRGAVHGRGRGRGRGRG	847..879	10	0	{'K': 1, 'I': 2, 'L': 1, 'S': 3, 'H': 2, 'A': 1, 'V': 1}	3.27706	1.2	36.3636	30.303	33.3333
>NP_071401.3 RNA-binding protein 26 isoform 3 [Homo sapiens]	KRGILSSGRGRGIHSRGRGAVHGRGRGRGRGRG	820..852	10	0	{'K': 1, 'I': 2, 'L': 1, 'S': 3, 'H': 2, 'A': 1, 'V': 1}	3.36735	1.2	36.3636	30.303	33.3333
>XP_005266548.1 RNA-binding protein 26 isoform X2 [Homo sapiens]	KRGILSSGRGRGIHSRGRGAVHGRGRGRGRGRG	862..894	10	0	{'K': 1, 'I': 2, 'L': 1, 'S': 3, 'H': 2, 'A': 1, 'V': 1}	3.22896	1.2	36.3636	30.303	33.3333
>XP_005266554.1 RNA-binding protein 26 isoform X16 [Homo sapiens]	KRGILSSGRGRGIHSRGRGAVHGRGRGRGRGRG	862..894	10	0	{'K': 1, 'I': 2, 'L': 1, 'S': 3, 'H': 2, 'A': 1, 'V': 1}	3.3	1.2	36.3636	30.303	33.3333
>XP_006719920.1 RNA-binding protein 26 isoform X17 [Homo sapiens]	KRGILSSGRGRGIHSRGRGAVHGRGRGRGRGRG	862..894	10	0	{'K': 1, 'I': 2, 'L': 1, 'S': 3, 'H': 2, 'A': 1, 'V': 1}	3.3033	1.2	36.3636	30.303	33.3333
>XP_011533481.1 RNA-binding protein 26 isoform X1 [Homo sapiens]	KRGILSSGRGRGIHSRGRGAVHGRGRGRGRGRG	862..894	10	0	{'K': 1, 'I': 2, 'L': 1, 'S': 3, 'H': 2, 'A': 1, 'V': 1}	3.21951	1.2	36.3636	30.303	33.3333
>XP_011533482.1 RNA-binding protein 26 isoform X2 [Homo sapiens]	KRGILSSGRGRGIHSRGRGAVHGRGRGRGRGRG	862..894	10	0	{'K': 1, 'I': 2, 'L': 1, 'S': 3, 'H': 2, 'A': 1, 'V': 1}	3.22896	1.2	36.3636	30.303	33.3333
>XP_011533483.1 RNA-binding protein 26 isoform X3 [Homo sapiens]	KRGILSSGRGRGIHSRGRGAVHGRGRGRGRGRG	859..891	10	0	{'K': 1, 'I': 2, 'L': 1, 'S': 3, 'H': 2, 'A': 1, 'V': 1}	3.22896	1.2	36.3636	30.303	33.3333
>XP_011533484.1 RNA-binding protein 26 isoform X4 [Homo sapiens]	KRGILSSGRGRGIHSRGRGAVHGRGRGRGRGRG	857..889	10	0	{'K': 1, 'I': 2, 'L': 1, 'S': 3, 'H': 2, 'A': 1, 'V': 1}	3.23529	1.2	36.3636	30.303	33.3333
>XP_011533485.1 RNA-binding protein 26 isoform X5 [Homo sapiens]	KRGILSSGRGRGIHSRGRGAVHGRGRGRGRGRG	859..891	10	0	{'K': 1, 'I': 2, 'L': 1, 'S': 3, 'H': 2, 'A': 1, 'V': 1}	3.23847	1.2	36.3636	30.303	33.3333
>XP_011533486.1 RNA-binding protein 26 isoform X8 [Homo sapiens]	KRGILSSGRGRGIHSRGRGAVHGRGRGRGRGRG	852..884	10	0	{'K': 1, 'I': 2, 'L': 1, 'S': 3, 'H': 2, 'A': 1, 'V': 1}	3.25123	1.2	36.3636	30.303	33.3333
>XP_011533487.1 RNA-binding protein 26 isoform X10 [Homo sapiens]	KRGILSSGRGRGIHSRGRGAVHGRGRGRGRGRG	852..884	10	0	{'K': 1, 'I': 2, 'L': 1, 'S': 3, 'H': 2, 'A': 1, 'V': 1}	3.26087	1.2	36.3636	30.303	33.3333
>XP_011533488.1 RNA-binding protein 26 isoform X11 [Homo sapiens]	KRGILSSGRGRGIHSRGRGAVHGRGRGRGRGRG	847..879	10	0	{'K': 1, 'I': 2, 'L': 1, 'S': 3, 'H': 2, 'A': 1, 'V': 1}	3.26733	1.2	36.3636	30.303	33.3333
>XP_011533489.1 RNA-binding protein 26 isoform X12 [Homo sapiens]	KRGILSSGRGRGIHSRGRGAVHGRGRGRGRGRG	849..881	10	0	{'K': 1, 'I': 2, 'L': 1, 'S': 3, 'H': 2, 'A': 1, 'V': 1}	3.27056	1.2	36.3636	30.303	33.3333
>XP_011533490.1 RNA-binding protein 26 isoform X13 [Homo sapiens]	KRGILSSGRGRGIHSRGRGAVHGRGRGRGRGRG	847..879	10	0	{'K': 1, 'I': 2, 'L': 1, 'S': 3, 'H': 2, 'A': 1, 'V': 1}	3.27706	1.2	36.3636	30.303	33.3333
>XP_011533491.1 RNA-binding protein 26 isoform X15 [Homo sapiens]	KRGILSSGRGRGIHSRGRGAVHGRGRGRGRGRG	838..870	10	0	{'K': 1, 'I': 2, 'L': 1, 'S': 3, 'H': 2, 'A': 1, 'V': 1}	3.2967	1.2	36.3636	30.303	33.3333
>XP_011533492.1 RNA-binding protein 26 isoform X19 [Homo sapiens]	KRGILSSGRGRGIHSRGRGAVHGRGRGRGRGRG	835..867	10	0	{'K': 1, 'I': 2, 'L': 1, 'S': 3, 'H': 2, 'A': 1, 'V': 1}	3.30661	1.2	36.3636	30.303	33.3333
>XP_011533493.1 RNA-binding protein 26 isoform X20 [Homo sapiens]	KRGILSSGRGRGIHSRGRGAVHGRGRGRGRGRG	835..867	10	0	{'K': 1, 'I': 2, 'L': 1, 'S': 3, 'H': 2, 'A': 1, 'V': 1}	3.31658	1.2	36.3636	30.303	33.3333
>XP_011533494.1 RNA-binding protein 26 isoform X27 [Homo sapiens]	KRGILSSGRGRGIHSRGRGAVHGRGRGRGRGRG	823..855	10	0	{'K': 1, 'I': 2, 'L': 1, 'S': 3, 'H': 2, 'A': 1, 'V': 1}	3.35707	1.2	36.3636	30.303	33.3333
>XP_011533495.1 RNA-binding protein 26 isoform X28 [Homo sapiens]	KRGILSSGRGRGIHSRGRGAVHGRGRGRGRGRG	820..852	10	0	{'K': 1, 'I': 2, 'L': 1, 'S': 3, 'H': 2, 'A': 1, 'V': 1}	3.36735	1.2	36.3636	30.303	33.3333
>XP_011533497.1 RNA-binding protein 26 isoform X32 [Homo sapiens]	KRGILSSGRGRGIHSRGRGAVHGRGRGRGRGRG	574..606	10	0	{'K': 1, 'I': 2, 'L': 1, 'S': 3, 'H': 2, 'A': 1, 'V': 1}	4.47761	1.2	36.3636	30.303	33.3333
>XP_016876177.1 RNA-binding protein 26 isoform X2 [Homo sapiens]	KRGILSSGRGRGIHSRGRGAVHGRGRGRGRGRG	862..894	10	0	{'K': 1, 'I': 2, 'L': 1, 'S': 3, 'H': 2, 'A': 1, 'V': 1}	3.22896	1.2	36.3636	30.303	33.3333
>XP_016876178.1 RNA-binding protein 26 isoform X7 [Homo sapiens]	KRGILSSGRGRGIHSRGRGAVHGRGRGRGRGRG	854..886	10	0	{'K': 1, 'I': 2, 'L': 1, 'S': 3, 'H': 2, 'A': 1, 'V': 1}	3.24484	1.2	36.3636	30.303	33.3333
>XP_016876179.1 RNA-binding protein 26 isoform X6 [Homo sapiens]	KRGILSSGRGRGIHSRGRGAVHGRGRGRGRGRG	857..889	10	0	{'K': 1, 'I': 2, 'L': 1, 'S': 3, 'H': 2, 'A': 1, 'V': 1}	3.24484	1.2	36.3636	30.303	33.3333
>XP_016876180.1 RNA-binding protein 26 isoform X9 [Homo sapiens]	KRGILSSGRGRGIHSRGRGAVHGRGRGRGRGRG	854..886	10	0	{'K': 1, 'I': 2, 'L': 1, 'S': 3, 'H': 2, 'A': 1, 'V': 1}	3.25444	1.2	36.3636	30.303	33.3333
>XP_016876181.1 RNA-binding protein 26 isoform X14 [Homo sapiens]	KRGILSSGRGRGIHSRGRGAVHGRGRGRGRGRG	844..876	10	0	{'K': 1, 'I': 2, 'L': 1, 'S': 3, 'H': 2, 'A': 1, 'V': 1}	3.28685	1.2	36.3636	30.303	33.3333
>XP_016876182.1 RNA-binding protein 26 isoform X18 [Homo sapiens]	KRGILSSGRGRGIHSRGRGAVHGRGRGRGRGRG	838..870	10	0	{'K': 1, 'I': 2, 'L': 1, 'S': 3, 'H': 2, 'A': 1, 'V': 1}	3.30661	1.2	36.3636	30.303	33.3333
>XP_016876183.1 RNA-binding protein 26 isoform X21 [Homo sapiens]	KRGILSSGRGRGIHSRGRGAVHGRGRGRGRGRG	833..865	10	0	{'K': 1, 'I': 2, 'L': 1, 'S': 3, 'H': 2, 'A': 1, 'V': 1}	3.32326	1.2	36.3636	30.303	33.3333
>XP_016876184.1 RNA-binding protein 26 isoform X22 [Homo sapiens]	KRGILSSGRGRGIHSRGRGAVHGRGRGRGRGRG	830..862	10	0	{'K': 1, 'I': 2, 'L': 1, 'S': 3, 'H': 2, 'A': 1, 'V': 1}	3.32326	1.2	36.3636	30.303	33.3333
>XP_016876185.1 RNA-binding protein 26 isoform X23 [Homo sapiens]	KRGILSSGRGRGIHSRGRGAVHGRGRGRGRGRG	833..865	10	0	{'K': 1, 'I': 2, 'L': 1, 'S': 3, 'H': 2, 'A': 1, 'V': 1}	3.31325	1.2	36.3636	30.303	33.3333
>XP_016876186.1 RNA-binding protein 26 isoform X24 [Homo sapiens]	KRGILSSGRGRGIHSRGRGAVHGRGRGRGRGRG	857..889	10	0	{'K': 1, 'I': 2, 'L': 1, 'S': 3, 'H': 2, 'A': 1, 'V': 1}	3.31992	1.2	36.3636	30.303	33.3333
>XP_016876187.1 RNA-binding protein 26 isoform X25 [Homo sapiens]	KRGILSSGRGRGIHSRGRGAVHGRGRGRGRGRG	823..855	10	0	{'K': 1, 'I': 2, 'L': 1, 'S': 3, 'H': 2, 'A': 1, 'V': 1}	3.34686	1.2	36.3636	30.303	33.3333
>XP_016876188.1 RNA-binding protein 26 isoform X26 [Homo sapiens]	KRGILSSGRGRGIHSRGRGAVHGRGRGRGRGRG	828..860	10	0	{'K': 1, 'I': 2, 'L': 1, 'S': 3, 'H': 2, 'A': 1, 'V': 1}	3.34008	1.2	36.3636	30.303	33.3333
>XP_016876189.1 RNA-binding protein 26 isoform X29 [Homo sapiens]	KRGILSSGRGRGIHSRGRGAVHGRGRGRGRGRG	820..852	10	0	{'K': 1, 'I': 2, 'L': 1, 'S': 3, 'H': 2, 'A': 1, 'V': 1}	3.35707	1.2	36.3636	30.303	33.3333
>XP_016876190.1 RNA-binding protein 26 isoform X30 [Homo sapiens]	KRGILSSGRGRGIHSRGRGAVHGRGRGRGRGRG	862..894	10	0	{'K': 1, 'I': 2, 'L': 1, 'S': 3, 'H': 2, 'A': 1, 'V': 1}	3.50318	1.2	36.3636	30.303	33.3333
>XP_016876191.1 RNA-binding protein 26 isoform X30 [Homo sapiens]	KRGILSSGRGRGIHSRGRGAVHGRGRGRGRGRG	862..894	10	0	{'K': 1, 'I': 2, 'L': 1, 'S': 3, 'H': 2, 'A': 1, 'V': 1}	3.50318	1.2	36.3636	30.303	33.3333
>XP_016876192.1 RNA-binding protein 26 isoform X31 [Homo sapiens]	KRGILSSGRGRGIHSRGRGAVHGRGRGRGRGRG	852..884	10	0	{'K': 1, 'I': 2, 'L': 1, 'S': 3, 'H': 2, 'A': 1, 'V': 1}	3.54077	1.2	36.3636	30.303	33.3333
>XP_024305161.1 RNA-binding protein 26 isoform X2 [Homo sapiens]	KRGILSSGRGRGIHSRGRGAVHGRGRGRGRGRG	862..894	10	0	{'K': 1, 'I': 2, 'L': 1, 'S': 3, 'H': 2, 'A': 1, 'V': 1}	3.22896	1.2	36.3636	30.303	33.3333
>NP_001276342.1 histone-lysine N-methyltransferase EHMT2 isoform c [Homo sapiens]	MRGLPRGRGLMRARGRGRAAPPGSRGRGRGGPHRGRG	1..37	9	1	{'M': 2, 'L': 2, 'P': 4, 'A': 3, 'S': 1, 'H': 1}	3.00081	1	32.4324	32.4324	35.1351	4
>NP_001350618.1 histone-lysine N-methyltransferase EHMT2 isoform e [Homo sapiens]	MRGLPRGRGLMRARGRGRAAPPGSRGRGRGGPHRGRG	1..37	9	1	{'M': 2, 'L': 2, 'P': 4, 'A': 3, 'S': 1, 'H': 1}	2.92028	1	32.4324	32.4324	35.1351
>XP_006715037.1 histone-lysine N-methyltransferase EHMT2 isoform X1 [Homo sapiens]	MRGLPRGRGLMRARGRGRAAPPGSRGRGRGGPHRGRG	1..37	9	1	{'M': 2, 'L': 2, 'P': 4, 'A': 3, 'S': 1, 'H': 1}	2.90424	1	32.4324	32.4324	35.1351
>XP_006715038.1 histone-lysine N-methyltransferase EHMT2 isoform X3 [Homo sapiens]	MRGLPRGRGLMRARGRGRAAPPGSRGRGRGGPHRGRG	1..37	9	1	{'M': 2, 'L': 2, 'P': 4, 'A': 3, 'S': 1, 'H': 1}	2.98387	1	32.4324	32.4324	35.1351
>XP_016881898.1 zinc finger protein 579 isoform X1 [Homo sapiens]	HRGRGRGRGRGRGRGRGRGRGG	15..36	9	1	{'H': 1}	3.4375	1.1	50	45.4545	4.54545	4
>XP_016881899.1 zinc finger protein 579 isoform X2 [Homo sapiens]	HRGRGRGRGRGRGRGRGRGRGG	15..36	9	1	{'H': 1}	3.50318	1.1	50	45.4545	4.54545
>XP_016881900.1 zinc finger protein 579 isoform X3 [Homo sapiens]	HRGRGRGRGRGRGRGRGRGRGG	15..36	9	1	{'H': 1}	3.56564	1.1	50	45.4545	4.54545
>NP_689813.2 zinc finger protein 579 [Homo sapiens]	HRGRGRGRGRGRGRGRGRGRGG	15..36	9	1	{'H': 1}	3.91459	1.1	50	45.4545	4.54545
>XP_005262170.1 bromodomain and WD repeat-containing protein 3 isoform X1 [Homo sapiens]	TRGTGGRG	1617..1624	2	0	{'T': 2}	0.456621	2	50	25	25	3
	SRGGRGRGGRGRGSRGRGGGGTRGRGRGRGGRGASRG	1633..1669	9	4	{'S': 3, 'T': 1, 'A': 1}	2.11187	1.46154	51.3514	35.1351	13.5135
>XP_016884873.1 bromodomain and WD repeat-containing protein 3 isoform X2 [Homo sapiens]	TRGTGGRG	1263..1270	2	0	{'T': 2}	0.572246	2	50	25	25
	SRGGRGRGGRGRGSRGRGGGGTRGRGRGRGGRGASRG	1279..1315	9	4	{'S': 3, 'T': 1, 'A': 1}	2.64664	1.46154	51.3514	35.1351	13.5135
>NP_694984.5 bromodomain and WD repeat-containing protein 3 [Homo sapiens]	TRGTGGRG	1667..1674	2	0	{'T': 2}	0.443951	2	50	25	25
	SRGGRGRGGRGRGSRGRGGGGTRGRGRGRGGRGASRG	1683..1719	9	4	{'S': 3, 'T': 1, 'A': 1}	2.05327	1.46154	51.3514	35.1351	13.5135
>NP_002943.2 40S ribosomal protein S2 [Homo sapiens]	GNRGGFRGGFGSGIRGRGRGRGRGRGRGRGARGG	20..53	8	3	{'N': 1, 'F': 2, 'S': 1, 'I': 1, 'A': 1}	11.6041	1.54545	50	32.3529	17.6471	1
>NP_003478.1 TATA-binding protein-associated factor 2N isoform 2 [Homo sapiens]	NRGYGGSQGGGRGRGGYDKDGRG	171..193	3	1	{'N': 1, 'Y': 2, 'S': 1, 'Q': 1, 'D': 2, 'K': 1}	3.90492	2.75	47.8261	17.3913	34.7826	3
	MRGGGSGGGRRGRGGYRGRGGFQGRGG	322..348	2	4	{'M': 1, 'S': 1, 'Y': 1, 'F': 1, 'Q': 1}	4.58404	2.14286	55.5556	25.9259	18.5185
	FRGRGYGGERGYRGRGGRGGDRGG	391..414	4	3	{'F': 1, 'Y': 2, 'E': 1, 'D': 1}	4.0747	1.71429	50	29.1667	20.8333
	GGDRGGGYGGDRGGGYGGDRGGGYGGDRGGYGGDRGGGYGGDRGGYGGDRGGYGGDRGGYGGDRGGYGGDRSRGGYGGDRGG	453..534	0	11	{'D': 11, 'Y': 10, 'S': 1}	13.9219	4	58.5366	14.6341	26.8293
	GGDRGGGYGGDRGG	556..569	0	2	{'D': 2, 'Y': 1}	2.37691	4.5	64.2857	14.2857	21.4286
>NP_631961.1 TATA-binding protein-associated factor 2N isoform 1 [Homo sapiens]	NRGYGGSQGGGRGRGGYDKDGRG	174..196	3	1	{'N': 1, 'Y': 2, 'S': 1, 'Q': 1, 'D': 2, 'K': 1}	3.88514	2.75	47.8261	17.3913	34.7826
	MRGGGSGGGRRGRGGYRGRGGFQGRGG	325..351	2	4	{'M': 1, 'S': 1, 'Y': 1, 'F': 1, 'Q': 1}	4.56081	2.14286	55.5556	25.9259	18.5185
	FRGRGYGGERGYRGRGGRGGDRGG	394..417	4	3	{'F': 1, 'Y': 2, 'E': 1, 'D': 1}	4.05405	1.71429	50	29.1667	20.8333
	GGDRGGGYGGDRGGGYGGDRGGGYGGDRGGYGGDRGGGYGGDRGGYGGDRGGYGGDRGGYGGDRGGYGGDRSRGGYGGDRGG	456..537	0	11	{'D': 11, 'Y': 10, 'S': 1}	13.8514	4	58.5366	14.6341	26.8293
	GGDRGGGYGGDRGG	559..572	0	2	{'D': 2, 'Y': 1}	2.36486	4.5	64.2857	14.2857	21.4286
>XP_024306727.1 TATA-binding protein-associated factor 2N isoform X1 [Homo sapiens]	MRGGGSGGGRRGRGGYRGRGGFQGRGG	56..82	2	4	{'M': 1, 'S': 1, 'Y': 1, 'F': 1, 'Q': 1}	8.35913	2.14286	55.5556	25.9259	18.5185
	FRGRGYGGERGYRGRGGRGGDRGG	125..148	4	3	{'F': 1, 'Y': 2, 'E': 1, 'D': 1}	7.43034	1.71429	50	29.1667	20.8333
	GGDRGGGYGGDRGGGYGGDRGGGYGGDRGGYGGDRGGGYGGDRGGYGGDRGGYGGDRGGYGGDRGGYGGDRSRGGYGGDRGG	187..268	0	11	{'D': 11, 'Y': 10, 'S': 1}	25.387	4	58.5366	14.6341	26.8293
	GGDRGGGYGGDRGG	290..303	0	2	{'D': 2, 'Y': 1}	4.33437	4.5	64.2857	14.2857	21.4286
>NP_001156757.1 RNA-binding protein EWS isoform 3 [Homo sapiens]	NRGRGRGGFDRGGMSRGGRGGGRGGMGAGERGG	299..331	2	6	{'N': 1, 'F': 1, 'D': 1, 'M': 2, 'S': 1, 'A': 1, 'E': 1}	5.03817	2.125	51.5152	24.2424	24.2424	28
	MRGGLPPREGRGMPPPLRGG	453..472	1	2	{'M': 2, 'L': 2, 'P': 5, 'E': 1}	3.05344	1.5	30	20	50
	GGRGGDRGGFPPRGPRGSRG	487..506	3	2	{'D': 1, 'F': 1, 'P': 3, 'S': 1}	3.05344	1.8	45	25	30
	GGDRGRGGPGGMRGGRGGLMDRGGPGGMFRGGRGGDRGGFRGGRGMDRGGFGGGRRGG	559..616	2	10	{'D': 4, 'P': 2, 'M': 4, 'L': 1, 'F': 3}	8.85496	2.38462	53.4483	22.4138	24.1379
	GGRRGGRGG	629..637	0	2	{}	1.37405	2	66.6667	33.3333	0
>NP_001156758.1 RNA-binding protein EWS isoform 4 [Homo sapiens]	NRGRGRGGFDRGGMSRGGRGGGRGGMGSAGERGG	243..276	2	6	{'N': 1, 'F': 1, 'D': 1, 'M': 2, 'S': 2, 'A': 1, 'E': 1}	5.66667	2.125	50	23.5294	26.4706
	MRGGLPPREGRGMPPPLRGG	398..417	1	2	{'M': 2, 'L': 2, 'P': 5, 'E': 1}	3.33333	1.5	30	20	50
	GGRGGDRGGFPPRGPRGSRG	432..451	3	2	{'D': 1, 'F': 1, 'P': 3, 'S': 1}	3.33333	1.8	45	25	30
	GGDRGRGGPGGMRGGRGGLMDRGGPGGMFRGGRGGDRGGFRGGRGMDRGGFGGGRRGG	504..561	2	10	{'D': 4, 'P': 2, 'M': 4, 'L': 1, 'F': 3}	9.66667	2.38462	53.4483	22.4138	24.1379
	GGRRGGRGG	574..582	0	2	{}	1.5	2	66.6667	33.3333	0
>NP_005234.1 RNA-binding protein EWS isoform 2 [Homo sapiens]	NRGRGRGGFDRGGMSRGGRGGGRGGMGSAGERGG	299..332	2	6	{'N': 1, 'F': 1, 'D': 1, 'M': 2, 'S': 2, 'A': 1, 'E': 1}	5.18293	2.125	50	23.5294	26.4706
	MRGGLPPREGRGMPPPLRGG	454..473	1	2	{'M': 2, 'L': 2, 'P': 5, 'E': 1}	3.04878	1.5	30	20	50
	GGRGGDRGGFPPRGPRGSRG	488..507	3	2	{'D': 1, 'F': 1, 'P': 3, 'S': 1}	3.04878	1.8	45	25	30
	GGDRGRGGPGGMRGGRGGLMDRGGPGGMFRGGRGGDRGGFRGGRGMDRGGFGGGRRGG	560..617	2	10	{'D': 4, 'P': 2, 'M': 4, 'L': 1, 'F': 3}	8.84146	2.38462	53.4483	22.4138	24.1379
	GGRRGGRGG	630..638	0	2	{}	1.37195	2	66.6667	33.3333	0
>NP_053733.2 RNA-binding protein EWS isoform 1 [Homo sapiens]	NRGRGRGGFDRGGMSRGGRGGGRGGMGAGERGG	305..337	2	6	{'N': 1, 'F': 1, 'D': 1, 'M': 2, 'S': 1, 'A': 1, 'E': 1}	4.99244	2.125	51.5152	24.2424	24.2424
	MRGGLPPREGRGMPPPLRGG	459..478	1	2	{'M': 2, 'L': 2, 'P': 5, 'E': 1}	3.02572	1.5	30	20	50
	GGRGGDRGGFPPRGPRGSRG	493..512	3	2	{'D': 1, 'F': 1, 'P': 3, 'S': 1}	3.02572	1.8	45	25	30
	GGDRGRGGPGGMRGGRGGLMDRGGPGGMFRGGRGGDRGGFRGGRGMDRGGFGGGRRGG	565..622	2	10	{'D': 4, 'P': 2, 'M': 4, 'L': 1, 'F': 3}	8.77458	2.38462	53.4483	22.4138	24.1379
	GGRRGGRGG	635..643	0	2	{}	1.36157	2	66.6667	33.3333	0
>XP_005261446.1 RNA-binding protein EWS isoform X2 [Homo sapiens]	NRGRGRGGFDRGGMSRGGRGGGRGGMGSAGERGG	299..332	2	6	{'N': 1, 'F': 1, 'D': 1, 'M': 2, 'S': 2, 'A': 1, 'E': 1}	5.08221	2.125	50	23.5294	26.4706
	MRGGLPPREGRGMPPPLRGG	454..473	1	2	{'M': 2, 'L': 2, 'P': 5, 'E': 1}	2.98954	1.5	30	20	50
	GGRGGDRGGFPPRGPRGSRG	488..507	3	2	{'D': 1, 'F': 1, 'P': 3, 'S': 1}	2.98954	1.8	45	25	30
	GGDRGRGGPGGMRGGRGGLMDRGGPGGMFRGGRGGDRGGFRGGRGMDRGGFGGGRRGG	573..630	2	10	{'D': 4, 'P': 2, 'M': 4, 'L': 1, 'F': 3}	8.66966	2.38462	53.4483	22.4138	24.1379
	GGRRGGRGG	643..651	0	2	{}	1.34529	2	66.6667	33.3333	0
>XP_005261447.1 RNA-binding protein EWS isoform X19 [Homo sapiens]	NRGRGRGGFDRGGMSRGGRGGGRGGMGSAGERGG	243..276	2	6	{'N': 1, 'F': 1, 'D': 1, 'M': 2, 'S': 2, 'A': 1, 'E': 1}	5.54649	2.125	50	23.5294	26.4706
	MRGGLPPREGRGMPPPLRGG	398..417	1	2	{'M': 2, 'L': 2, 'P': 5, 'E': 1}	3.26264	1.5	30	20	50
	GGRGGDRGGFPPRGPRGSRG	432..451	3	2	{'D': 1, 'F': 1, 'P': 3, 'S': 1}	3.26264	1.8	45	25	30
	GGDRGRGGPGGMRGGRGGLMDRGGPGGMFRGGRGGDRGGFRGGRGMDRGGFGGGRRGG	517..574	2	10	{'D': 4, 'P': 2, 'M': 4, 'L': 1, 'F': 3}	9.46166	2.38462	53.4483	22.4138	24.1379
>XP_011528297.1 RNA-binding protein EWS isoform X1 [Homo sapiens]	NRGRGRGGFDRGGMSRGGRGGGRGGMGSAGERGG	300..333	2	6	{'N': 1, 'F': 1, 'D': 1, 'M': 2, 'S': 2, 'A': 1, 'E': 1}	5.07463	2.125	50	23.5294	26.4706
	MRGGLPPREGRGMPPPLRGG	455..474	1	2	{'M': 2, 'L': 2, 'P': 5, 'E': 1}	2.98507	1.5	30	20	50
	GGRGGDRGGFPPRGPRGSRG	489..508	3	2	{'D': 1, 'F': 1, 'P': 3, 'S': 1}	2.98507	1.8	45	25	30
	GGDRGRGGPGGMRGGRGGLMDRGGPGGMFRGGRGGDRGGFRGGRGMDRGGFGGGRRGG	574..631	2	10	{'D': 4, 'P': 2, 'M': 4, 'L': 1, 'F': 3}	8.65672	2.38462	53.4483	22.4138	24.1379
	GGRRGGRGG	644..652	0	2	{}	1.34328	2	66.6667	33.3333	0
>XP_011528298.1 RNA-binding protein EWS isoform X3 [Homo sapiens]	NRGRGRGGFDRGGMSRGGRGGGRGGMGAGERGG	300..332	2	6	{'N': 1, 'F': 1, 'D': 1, 'M': 2, 'S': 1, 'A': 1, 'E': 1}	4.93274	2.125	51.5152	24.2424	24.2424
	MRGGLPPREGRGMPPPLRGG	454..473	1	2	{'M': 2, 'L': 2, 'P': 5, 'E': 1}	2.98954	1.5	30	20	50
	GGRGGDRGGFPPRGPRGSRG	488..507	3	2	{'D': 1, 'F': 1, 'P': 3, 'S': 1}	2.98954	1.8	45	25	30
	GGDRGRGGPGGMRGGRGGLMDRGGPGGMFRGGRGGDRGGFRGGRGMDRGGFGGGRRGG	573..630	2	10	{'D': 4, 'P': 2, 'M': 4, 'L': 1, 'F': 3}	8.66966	2.38462	53.4483	22.4138	24.1379
	GGRRGGRGG	643..651	0	2	{}	1.34529	2	66.6667	33.3333	0
>XP_011528299.1 RNA-binding protein EWS isoform X5 [Homo sapiens]	NRGRGRGGFDRGGMSRGGRGGGRGGMGSAGERGG	300..333	2	6	{'N': 1, 'F': 1, 'D': 1, 'M': 2, 'S': 2, 'A': 1, 'E': 1}	5.17504	2.125	50	23.5294	26.4706
	MRGGLPPREGRGMPPPLRGG	455..474	1	2	{'M': 2, 'L': 2, 'P': 5, 'E': 1}	3.04414	1.5	30	20	50
	GGRGGDRGGFPPRGPRGSRG	489..508	3	2	{'D': 1, 'F': 1, 'P': 3, 'S': 1}	3.04414	1.8	45	25	30
	GGDRGRGGPGGMRGGRGGLMDRGGPGGMFRGGRGGDRGGFRGGRGMDRGGFGGGRRGG	561..618	2	10	{'D': 4, 'P': 2, 'M': 4, 'L': 1, 'F': 3}	8.82801	2.38462	53.4483	22.4138	24.1379
	GGRRGGRGG	631..639	0	2	{}	1.36986	2	66.6667	33.3333	0
>XP_011528300.1 RNA-binding protein EWS isoform X6 [Homo sapiens]	NRGRGRGGFDRGGMSRGGRGGGRGGMGAGERGG	300..332	2	6	{'N': 1, 'F': 1, 'D': 1, 'M': 2, 'S': 1, 'A': 1, 'E': 1}	5.03049	2.125	51.5152	24.2424	24.2424
	MRGGLPPREGRGMPPPLRGG	454..473	1	2	{'M': 2, 'L': 2, 'P': 5, 'E': 1}	3.04878	1.5	30	20	50
	GGRGGDRGGFPPRGPRGSRG	488..507	3	2	{'D': 1, 'F': 1, 'P': 3, 'S': 1}	3.04878	1.8	45	25	30
	GGDRGRGGPGGMRGGRGGLMDRGGPGGMFRGGRGGDRGGFRGGRGMDRGGFGGGRRGG	560..617	2	10	{'D': 4, 'P': 2, 'M': 4, 'L': 1, 'F': 3}	8.84146	2.38462	53.4483	22.4138	24.1379
	GGRRGGRGG	630..638	0	2	{}	1.37195	2	66.6667	33.3333	0
>XP_011528301.1 RNA-binding protein EWS isoform X7 [Homo sapiens]	NRGRGRGGFDRGGMSRGGRGGGRGGMGSAGERGG	300..333	2	6	{'N': 1, 'F': 1, 'D': 1, 'M': 2, 'S': 2, 'A': 1, 'E': 1}	5.20674	2.125	50	23.5294	26.4706
	MRGGLPPREGRGMPPPLRGG	455..474	1	2	{'M': 2, 'L': 2, 'P': 5, 'E': 1}	3.06279	1.5	30	20	50
	GGRGGDRGGFPPRGPRGSRG	489..508	3	2	{'D': 1, 'F': 1, 'P': 3, 'S': 1}	3.06279	1.8	45	25	30
	GDRGRGGPGGMRGGRGGLMDRGGPGGMFRGGRGGDRGGFRGGRGMDRGGFGGGRRGG	558..614	2	10	{'D': 4, 'P': 2, 'M': 4, 'L': 1, 'F': 3}	8.72894	2.30769	52.6316	22.807	24.5614
	GGRRGGRGG	627..635	0	2	{}	1.37825	2	66.6667	33.3333	0
>XP_011528302.1 RNA-binding protein EWS isoform X11 [Homo sapiens]	NRGRGRGGFDRGGMSRGGRGGGRGGMGSAGERGG	300..333	2	6	{'N': 1, 'F': 1, 'D': 1, 'M': 2, 'S': 2, 'A': 1, 'E': 1}	5.3125	2.125	50	23.5294	26.4706
	MRGGLPPREGRGMPPPLRGG	455..474	1	2	{'M': 2, 'L': 2, 'P': 5, 'E': 1}	3.125	1.5	30	20	50
	GGRGGDRGGFPPRGPRGSRG	489..508	3	2	{'D': 1, 'F': 1, 'P': 3, 'S': 1}	3.125	1.8	45	25	30
	GDRGRGGPGGMRGGRGGLMDRGGPGGMFRGGRGGDRGGFRGGRGMDRGGFGGGRRGG	545..601	2	10	{'D': 4, 'P': 2, 'M': 4, 'L': 1, 'F': 3}	8.90625	2.30769	52.6316	22.807	24.5614
	GGRRGGRGG	614..622	0	2	{}	1.40625	2	66.6667	33.3333	0
>XP_011528303.1 RNA-binding protein EWS isoform X18 [Homo sapiens]	NRGRGRGGFDRGGMSRGGRGGGRGGMGSAGERGG	244..277	2	6	{'N': 1, 'F': 1, 'D': 1, 'M': 2, 'S': 2, 'A': 1, 'E': 1}	5.53746	2.125	50	23.5294	26.4706
	MRGGLPPREGRGMPPPLRGG	399..418	1	2	{'M': 2, 'L': 2, 'P': 5, 'E': 1}	3.25733	1.5	30	20	50
	GGRGGDRGGFPPRGPRGSRG	433..452	3	2	{'D': 1, 'F': 1, 'P': 3, 'S': 1}	3.25733	1.8	45	25	30
	GGDRGRGGPGGMRGGRGGLMDRGGPGGMFRGGRGGDRGGFRGGRGMDRGGFGGGRRGG	518..575	2	10	{'D': 4, 'P': 2, 'M': 4, 'L': 1, 'F': 3}	9.44625	2.38462	53.4483	22.4138	24.1379
	GGRRGGRGG	588..596	0	2	{}	1.4658	2	66.6667	33.3333	0
>XP_011528304.1 RNA-binding protein EWS isoform X27 [Homo sapiens]	MRGGLPPREGRGMPPPLRGG	382..401	1	2	{'M': 2, 'L': 2, 'P': 5, 'E': 1}	3.35008	1.5	30	20	50
	GGRGGDRGGFPPRGPRGSRG	416..435	3	2	{'D': 1, 'F': 1, 'P': 3, 'S': 1}	3.35008	1.8	45	25	30
	GGDRGRGGPGGMRGGRGGLMDRGGPGGMFRGGRGGDRGGFRGGRGMDRGGFGGGRRGG	501..558	2	10	{'D': 4, 'P': 2, 'M': 4, 'L': 1, 'F': 3}	9.71524	2.38462	53.4483	22.4138	24.1379
	GGRRGGRGG	571..579	0	2	{}	1.50754	2	66.6667	33.3333	0
>XP_016884133.1 RNA-binding protein EWS isoform X4 [Homo sapiens]	NRGRGRGGFDRGGMSRGGRGGGRGGMGAGERGG	299..331	2	6	{'N': 1, 'F': 1, 'D': 1, 'M': 2, 'S': 1, 'A': 1, 'E': 1}	4.94012	2.125	51.5152	24.2424	24.2424
	MRGGLPPREGRGMPPPLRGG	453..472	1	2	{'M': 2, 'L': 2, 'P': 5, 'E': 1}	2.99401	1.5	30	20	50
	GGRGGDRGGFPPRGPRGSRG	487..506	3	2	{'D': 1, 'F': 1, 'P': 3, 'S': 1}	2.99401	1.8	45	25	30
	GGDRGRGGPGGMRGGRGGLMDRGGPGGMFRGGRGGDRGGFRGGRGMDRGGFGGGRRGG	572..629	2	10	{'D': 4, 'P': 2, 'M': 4, 'L': 1, 'F': 3}	8.68263	2.38462	53.4483	22.4138	24.1379
	GGRRGGRGG	642..650	0	2	{}	1.34731	2	66.6667	33.3333	0
>XP_016884134.1 RNA-binding protein EWS isoform X8 [Homo sapiens]	NRGRGRGGFDRGGMSRGGRGGGRGGMGSAGERGG	299..332	2	6	{'N': 1, 'F': 1, 'D': 1, 'M': 2, 'S': 2, 'A': 1, 'E': 1}	5.21472	2.125	50	23.5294	26.4706
	MRGGLPPREGRGMPPPLRGG	454..473	1	2	{'M': 2, 'L': 2, 'P': 5, 'E': 1}	3.06748	1.5	30	20	50
	GGRGGDRGGFPPRGPRGSRG	488..507	3	2	{'D': 1, 'F': 1, 'P': 3, 'S': 1}	3.06748	1.8	45	25	30
	GDRGRGGPGGMRGGRGGLMDRGGPGGMFRGGRGGDRGGFRGGRGMDRGGFGGGRRGG	557..613	2	10	{'D': 4, 'P': 2, 'M': 4, 'L': 1, 'F': 3}	8.74233	2.30769	52.6316	22.807	24.5614
	GGRRGGRGG	626..634	0	2	{}	1.38037	2	66.6667	33.3333	0
>XP_016884135.1 RNA-binding protein EWS isoform X9 [Homo sapiens]	NRGRGRGGFDRGGMSRGGRGGGRGGMGAGERGG	300..332	2	6	{'N': 1, 'F': 1, 'D': 1, 'M': 2, 'S': 1, 'A': 1, 'E': 1}	5.06135	2.125	51.5152	24.2424	24.2424
	MRGGLPPREGRGMPPPLRGG	454..473	1	2	{'M': 2, 'L': 2, 'P': 5, 'E': 1}	3.06748	1.5	30	20	50
	GGRGGDRGGFPPRGPRGSRG	488..507	3	2	{'D': 1, 'F': 1, 'P': 3, 'S': 1}	3.06748	1.8	45	25	30
	GDRGRGGPGGMRGGRGGLMDRGGPGGMFRGGRGGDRGGFRGGRGMDRGGFGGGRRGG	557..613	2	10	{'D': 4, 'P': 2, 'M': 4, 'L': 1, 'F': 3}	8.74233	2.30769	52.6316	22.807	24.5614
	GGRRGGRGG	626..634	0	2	{}	1.38037	2	66.6667	33.3333	0
>XP_016884136.1 RNA-binding protein EWS isoform X10 [Homo sapiens]	NRGRGRGGFDRGGMSRGGRGGGRGGMGAGERGG	299..331	2	6	{'N': 1, 'F': 1, 'D': 1, 'M': 2, 'S': 1, 'A': 1, 'E': 1}	5.06912	2.125	51.5152	24.2424	24.2424
	MRGGLPPREGRGMPPPLRGG	453..472	1	2	{'M': 2, 'L': 2, 'P': 5, 'E': 1}	3.0722	1.5	30	20	50
	GGRGGDRGGFPPRGPRGSRG	487..506	3	2	{'D': 1, 'F': 1, 'P': 3, 'S': 1}	3.0722	1.8	45	25	30
	GDRGRGGPGGMRGGRGGLMDRGGPGGMFRGGRGGDRGGFRGGRGMDRGGFGGGRRGG	556..612	2	10	{'D': 4, 'P': 2, 'M': 4, 'L': 1, 'F': 3}	8.75576	2.30769	52.6316	22.807	24.5614
	GGRRGGRGG	625..633	0	2	{}	1.38249	2	66.6667	33.3333	0
>XP_016884137.1 RNA-binding protein EWS isoform X12 [Homo sapiens]	NRGRGRGGFDRGGMSRGGRGGGRGGMGAGERGG	299..331	2	6	{'N': 1, 'F': 1, 'D': 1, 'M': 2, 'S': 1, 'A': 1, 'E': 1}	5.17241	2.125	51.5152	24.2424	24.2424
	MRGGLPPREGRGMPPPLRGG	453..472	1	2	{'M': 2, 'L': 2, 'P': 5, 'E': 1}	3.1348	1.5	30	20	50
	GGRGGDRGGFPPRGPRGSRG	487..506	3	2	{'D': 1, 'F': 1, 'P': 3, 'S': 1}	3.1348	1.8	45	25	30
	GDRGRGGPGGMRGGRGGLMDRGGPGGMFRGGRGGDRGGFRGGRGMDRGGFGGGRRGG	543..599	2	10	{'D': 4, 'P': 2, 'M': 4, 'L': 1, 'F': 3}	8.93417	2.30769	52.6316	22.807	24.5614
	GGRRGGRGG	612..620	0	2	{}	1.41066	2	66.6667	33.3333	0
>XP_016884138.1 RNA-binding protein EWS isoform X13 [Homo sapiens]	NRGRGRGGFDRGGMSRGGRGGGRGGMGSAGERGG	300..333	2	6	{'N': 1, 'F': 1, 'D': 1, 'M': 2, 'S': 2, 'A': 1, 'E': 1}	5.40541	2.125	50	23.5294	26.4706
	GGRGGDRGGFPPRGPRGSRG	448..467	3	2	{'D': 1, 'F': 1, 'P': 3, 'S': 1}	3.17965	1.8	45	25	30
	GGDRGRGGPGGMRGGRGGLMDRGGPGGMFRGGRGGDRGGFRGGRGMDRGGFGGGRRGG	533..590	2	10	{'D': 4, 'P': 2, 'M': 4, 'L': 1, 'F': 3}	9.22099	2.38462	53.4483	22.4138	24.1379
	GGRRGGRGG	603..611	0	2	{}	1.43084	2	66.6667	33.3333	0
>XP_016884139.1 RNA-binding protein EWS isoform X14 [Homo sapiens]	NRGRGRGGFDRGGMSRGGRGGGRGGMGSAGERGG	300..333	2	6	{'N': 1, 'F': 1, 'D': 1, 'M': 2, 'S': 2, 'A': 1, 'E': 1}	5.51948	2.125	50	23.5294	26.4706
	GGRGGDRGGFPPRGPRGSRG	448..467	3	2	{'D': 1, 'F': 1, 'P': 3, 'S': 1}	3.24675	1.8	45	25	30
	GGDRGRGGPGGMRGGRGGLMDRGGPGGMFRGGRGGDRGGFRGGRGMDRGGFGGGRRGG	520..577	2	10	{'D': 4, 'P': 2, 'M': 4, 'L': 1, 'F': 3}	9.41558	2.38462	53.4483	22.4138	24.1379
	GGRRGGRGG	590..598	0	2	{}	1.46104	2	66.6667	33.3333	0
>XP_016884140.1 RNA-binding protein EWS isoform X15 [Homo sapiens]	NRGRGRGGFDRGGMSRGGRGGGRGGMGSAGERGG	299..332	2	6	{'N': 1, 'F': 1, 'D': 1, 'M': 2, 'S': 2, 'A': 1, 'E': 1}	5.52846	2.125	50	23.5294	26.4706
	GGRGGDRGGFPPRGPRGSRG	447..466	3	2	{'D': 1, 'F': 1, 'P': 3, 'S': 1}	3.25203	1.8	45	25	30
	GGDRGRGGPGGMRGGRGGLMDRGGPGGMFRGGRGGDRGGFRGGRGMDRGGFGGGRRGG	519..576	2	10	{'D': 4, 'P': 2, 'M': 4, 'L': 1, 'F': 3}	9.43089	2.38462	53.4483	22.4138	24.1379
	GGRRGGRGG	589..597	0	2	{}	1.46341	2	66.6667	33.3333	0
>XP_016884141.1 RNA-binding protein EWS isoform X16 [Homo sapiens]	NRGRGRGGFDRGGMSRGGRGGGRGGMGAGERGG	300..332	2	6	{'N': 1, 'F': 1, 'D': 1, 'M': 2, 'S': 1, 'A': 1, 'E': 1}	5.36585	2.125	51.5152	24.2424	24.2424
	GGRGGDRGGFPPRGPRGSRG	447..466	3	2	{'D': 1, 'F': 1, 'P': 3, 'S': 1}	3.25203	1.8	45	25	30
	GGDRGRGGPGGMRGGRGGLMDRGGPGGMFRGGRGGDRGGFRGGRGMDRGGFGGGRRGG	519..576	2	10	{'D': 4, 'P': 2, 'M': 4, 'L': 1, 'F': 3}	9.43089	2.38462	53.4483	22.4138	24.1379
	GGRRGGRGG	589..597	0	2	{}	1.46341	2	66.6667	33.3333	0
>XP_016884142.1 RNA-binding protein EWS isoform X17 [Homo sapiens]	NRGRGRGGFDRGGMSRGGRGGGRGGMGAGERGG	299..331	2	6	{'N': 1, 'F': 1, 'D': 1, 'M': 2, 'S': 1, 'A': 1, 'E': 1}	5.37459	2.125	51.5152	24.2424	24.2424
	GGRGGDRGGFPPRGPRGSRG	446..465	3	2	{'D': 1, 'F': 1, 'P': 3, 'S': 1}	3.25733	1.8	45	25	30
	GGDRGRGGPGGMRGGRGGLMDRGGPGGMFRGGRGGDRGGFRGGRGMDRGGFGGGRRGG	518..575	2	10	{'D': 4, 'P': 2, 'M': 4, 'L': 1, 'F': 3}	9.44625	2.38462	53.4483	22.4138	24.1379
	GGRRGGRGG	588..596	0	2	{}	1.4658	2	66.6667	33.3333	0
>XP_016884143.1 RNA-binding protein EWS isoform X20 [Homo sapiens]	NRGRGRGGFDRGGMSRGGRGGGRGGMGAGERGG	244..276	2	6	{'N': 1, 'F': 1, 'D': 1, 'M': 2, 'S': 1, 'A': 1, 'E': 1}	5.38336	2.125	51.5152	24.2424	24.2424
	MRGGLPPREGRGMPPPLRGG	398..417	1	2	{'M': 2, 'L': 2, 'P': 5, 'E': 1}	3.26264	1.5	30	20	50
	GGRGGDRGGFPPRGPRGSRG	432..451	3	2	{'D': 1, 'F': 1, 'P': 3, 'S': 1}	3.26264	1.8	45	25	30
	GGDRGRGGPGGMRGGRGGLMDRGGPGGMFRGGRGGDRGGFRGGRGMDRGGFGGGRRGG	517..574	2	10	{'D': 4, 'P': 2, 'M': 4, 'L': 1, 'F': 3}	9.46166	2.38462	53.4483	22.4138	24.1379
	GGRRGGRGG	587..595	0	2	{}	1.46819	2	66.6667	33.3333	0
>XP_016884144.1 RNA-binding protein EWS isoform X21 [Homo sapiens]	NRGRGRGGFDRGGMSRGGRGGGRGGMGAGERGG	243..275	2	6	{'N': 1, 'F': 1, 'D': 1, 'M': 2, 'S': 1, 'A': 1, 'E': 1}	5.39216	2.125	51.5152	24.2424	24.2424
	MRGGLPPREGRGMPPPLRGG	397..416	1	2	{'M': 2, 'L': 2, 'P': 5, 'E': 1}	3.26797	1.5	30	20	50
	GGRGGDRGGFPPRGPRGSRG	431..450	3	2	{'D': 1, 'F': 1, 'P': 3, 'S': 1}	3.26797	1.8	45	25	30
	GGDRGRGGPGGMRGGRGGLMDRGGPGGMFRGGRGGDRGGFRGGRGMDRGGFGGGRRGG	516..573	2	10	{'D': 4, 'P': 2, 'M': 4, 'L': 1, 'F': 3}	9.47712	2.38462	53.4483	22.4138	24.1379
	GGRRGGRGG	586..594	0	2	{}	1.47059	2	66.6667	33.3333	0
>XP_016884145.1 RNA-binding protein EWS isoform X22 [Homo sapiens]	NRGRGRGGFDRGGMSRGGRGGGRGGMGSAGERGG	299..332	2	6	{'N': 1, 'F': 1, 'D': 1, 'M': 2, 'S': 2, 'A': 1, 'E': 1}	5.56465	2.125	50	23.5294	26.4706
	GGRGGDRGGFPPRGPRGSRG	447..466	3	2	{'D': 1, 'F': 1, 'P': 3, 'S': 1}	3.27332	1.8	45	25	30
	GDRGRGGPGGMRGGRGGLMDRGGPGGMFRGGRGGDRGGFRGGRGMDRGGFGGGRRGG	516..572	2	10	{'D': 4, 'P': 2, 'M': 4, 'L': 1, 'F': 3}	9.32897	2.30769	52.6316	22.807	24.5614
	GGRRGGRGG	585..593	0	2	{}	1.473	2	66.6667	33.3333	0
>XP_016884146.1 RNA-binding protein EWS isoform X23 [Homo sapiens]	NRGRGRGGFDRGGMSRGGRGGGRGGMGSAGERGG	231..264	2	6	{'N': 1, 'F': 1, 'D': 1, 'M': 2, 'S': 2, 'A': 1, 'E': 1}	5.65724	2.125	50	23.5294	26.4706
	MRGGLPPREGRGMPPPLRGG	386..405	1	2	{'M': 2, 'L': 2, 'P': 5, 'E': 1}	3.32779	1.5	30	20	50
	GGRGGDRGGFPPRGPRGSRG	420..439	3	2	{'D': 1, 'F': 1, 'P': 3, 'S': 1}	3.32779	1.8	45	25	30
	GGDRGRGGPGGMRGGRGGLMDRGGPGGMFRGGRGGDRGGFRGGRGMDRGGFGGGRRGG	505..562	2	10	{'D': 4, 'P': 2, 'M': 4, 'L': 1, 'F': 3}	9.65058	2.38462	53.4483	22.4138	24.1379
	GGRRGGRGG	575..583	0	2	{}	1.4975	2	66.6667	33.3333	0
>XP_016884147.1 RNA-binding protein EWS isoform X24 [Homo sapiens]	NRGRGRGGFDRGGMSRGGRGGGRGGMGAGERGG	244..276	2	6	{'N': 1, 'F': 1, 'D': 1, 'M': 2, 'S': 1, 'A': 1, 'E': 1}	5.5	2.125	51.5152	24.2424	24.2424
	MRGGLPPREGRGMPPPLRGG	398..417	1	2	{'M': 2, 'L': 2, 'P': 5, 'E': 1}	3.33333	1.5	30	20	50
	GGRGGDRGGFPPRGPRGSRG	432..451	3	2	{'D': 1, 'F': 1, 'P': 3, 'S': 1}	3.33333	1.8	45	25	30
	GGDRGRGGPGGMRGGRGGLMDRGGPGGMFRGGRGGDRGGFRGGRGMDRGGFGGGRRGG	504..561	2	10	{'D': 4, 'P': 2, 'M': 4, 'L': 1, 'F': 3}	9.66667	2.38462	53.4483	22.4138	24.1379
	GGRRGGRGG	574..582	0	2	{}	1.5	2	66.6667	33.3333	0
>XP_016884148.1 RNA-binding protein EWS isoform X25 [Homo sapiens]	NRGRGRGGFDRGGMSRGGRGGGRGGMGAGERGG	243..275	2	6	{'N': 1, 'F': 1, 'D': 1, 'M': 2, 'S': 1, 'A': 1, 'E': 1}	5.50918	2.125	51.5152	24.2424	24.2424
	MRGGLPPREGRGMPPPLRGG	397..416	1	2	{'M': 2, 'L': 2, 'P': 5, 'E': 1}	3.3389	1.5	30	20	50
	GGRGGDRGGFPPRGPRGSRG	431..450	3	2	{'D': 1, 'F': 1, 'P': 3, 'S': 1}	3.3389	1.8	45	25	30
	GGDRGRGGPGGMRGGRGGLMDRGGPGGMFRGGRGGDRGGFRGGRGMDRGGFGGGRRGG	503..560	2	10	{'D': 4, 'P': 2, 'M': 4, 'L': 1, 'F': 3}	9.6828	2.38462	53.4483	22.4138	24.1379
	GGRRGGRGG	573..581	0	2	{}	1.5025	2	66.6667	33.3333	0
>XP_016884149.1 RNA-binding protein EWS isoform X26 [Homo sapiens]	NRGRGRGGFDRGGMSRGGRGGGRGGMGAGERGG	299..331	2	6	{'N': 1, 'F': 1, 'D': 1, 'M': 2, 'S': 1, 'A': 1, 'E': 1}	5.52764	2.125	51.5152	24.2424	24.2424
	GGRGGDRGGFPPRGPRGSRG	446..465	3	2	{'D': 1, 'F': 1, 'P': 3, 'S': 1}	3.35008	1.8	45	25	30
	GDRGRGGPGGMRGGRGGLMDRGGPGGMFRGGRGGDRGGFRGGRGMDRGGFGGGRRGG	502..558	2	10	{'D': 4, 'P': 2, 'M': 4, 'L': 1, 'F': 3}	9.54774	2.30769	52.6316	22.807	24.5614
	GGRRGGRGG	571..579	0	2	{}	1.50754	2	66.6667	33.3333	0
>XP_016884150.1 RNA-binding protein EWS isoform X28 [Homo sapiens]	NRGRGRGGFDRGGMSRGGRGGGRGGMGAGERGG	231..263	2	6	{'N': 1, 'F': 1, 'D': 1, 'M': 2, 'S': 1, 'A': 1, 'E': 1}	5.62181	2.125	51.5152	24.2424	24.2424
	MRGGLPPREGRGMPPPLRGG	385..404	1	2	{'M': 2, 'L': 2, 'P': 5, 'E': 1}	3.40716	1.5	30	20	50
	GGRGGDRGGFPPRGPRGSRG	419..438	3	2	{'D': 1, 'F': 1, 'P': 3, 'S': 1}	3.40716	1.8	45	25	30
	GGDRGRGGPGGMRGGRGGLMDRGGPGGMFRGGRGGDRGGFRGGRGMDRGGFGGGRRGG	491..548	2	10	{'D': 4, 'P': 2, 'M': 4, 'L': 1, 'F': 3}	9.88075	2.38462	53.4483	22.4138	24.1379
	GGRRGGRGG	561..569	0	2	{}	1.53322	2	66.6667	33.3333	0
>XP_016884151.1 RNA-binding protein EWS isoform X29 [Homo sapiens]	NRGRGRGGFDRGGMSRGGRGGGRGGMGAGERGG	243..275	2	6	{'N': 1, 'F': 1, 'D': 1, 'M': 2, 'S': 1, 'A': 1, 'E': 1}	5.6701	2.125	51.5152	24.2424	24.2424
	MRGGLPPREGRGMPPPLRGG	397..416	1	2	{'M': 2, 'L': 2, 'P': 5, 'E': 1}	3.43643	1.5	30	20	50
	GGRGGDRGGFPPRGPRGSRG	431..450	3	2	{'D': 1, 'F': 1, 'P': 3, 'S': 1}	3.43643	1.8	45	25	30
	GDRGRGGPGGMRGGRGGLMDRGGPGGMFRGGRGGDRGGFRGGRGMDRGGFGGGRRGG	487..543	2	10	{'D': 4, 'P': 2, 'M': 4, 'L': 1, 'F': 3}	9.79381	2.30769	52.6316	22.807	24.5614
	GGRRGGRGG	556..564	0	2	{}	1.54639	2	66.6667	33.3333	0
>XP_016884152.1 RNA-binding protein EWS isoform X32 [Homo sapiens]	NRGRGRGGFDRGGMSRGGRGGGRGGMGAGERGG	243..275	2	6	{'N': 1, 'F': 1, 'D': 1, 'M': 2, 'S': 1, 'A': 1, 'E': 1}	5.91398	2.125	51.5152	24.2424	24.2424
	GGRGGDRGGFPPRGPRGSRG	390..409	3	2	{'D': 1, 'F': 1, 'P': 3, 'S': 1}	3.58423	1.8	45	25	30
	GGDRGRGGPGGMRGGRGGLMDRGGPGGMFRGGRGGDRGGFRGGRGMDRGGFGGGRRGG	462..519	2	10	{'D': 4, 'P': 2, 'M': 4, 'L': 1, 'F': 3}	10.3943	2.38462	53.4483	22.4138	24.1379
	GGRRGGRGG	532..540	0	2	{}	1.6129	2	66.6667	33.3333	0
>XP_016884153.1 RNA-binding protein EWS isoform X33 [Homo sapiens]	MRGGLPPREGRGMPPPLRGG	115..134	1	2	{'M': 2, 'L': 2, 'P': 5, 'E': 1}	6.06061	1.5	30	20	50
	GGRGGDRGGFPPRGPRGSRG	149..168	3	2	{'D': 1, 'F': 1, 'P': 3, 'S': 1}	6.06061	1.8	45	25	30
	GGDRGRGGPGGMRGGRGGLMDRGGPGGMFRGGRGGDRGGFRGGRGMDRGGFGGGRRGG	234..291	2	10	{'D': 4, 'P': 2, 'M': 4, 'L': 1, 'F': 3}	17.5758	2.38462	53.4483	22.4138	24.1379
	GGRRGGRGG	304..312	0	2	{}	2.72727	2	66.6667	33.3333	0
>XP_016884154.1 RNA-binding protein EWS isoform X34 [Homo sapiens]	MRGGLPPREGRGMPPPLRGG	115..134	1	2	{'M': 2, 'L': 2, 'P': 5, 'E': 1}	6.30915	1.5	30	20	50
	GGRGGDRGGFPPRGPRGSRG	149..168	3	2	{'D': 1, 'F': 1, 'P': 3, 'S': 1}	6.30915	1.8	45	25	30
	GGDRGRGGPGGMRGGRGGLMDRGGPGGMFRGGRGGDRGGFRGGRGMDRGGFGGGRRGG	221..278	2	10	{'D': 4, 'P': 2, 'M': 4, 'L': 1, 'F': 3}	18.2965	2.38462	53.4483	22.4138	24.1379
	GGRRGGRGG	291..299	0	2	{}	2.83912	2	66.6667	33.3333	0
>XP_016884155.1 RNA-binding protein EWS isoform X34 [Homo sapiens]	MRGGLPPREGRGMPPPLRGG	115..134	1	2	{'M': 2, 'L': 2, 'P': 5, 'E': 1}	6.30915	1.5	30	20	50
	GGRGGDRGGFPPRGPRGSRG	149..168	3	2	{'D': 1, 'F': 1, 'P': 3, 'S': 1}	6.30915	1.8	45	25	30
	GGDRGRGGPGGMRGGRGGLMDRGGPGGMFRGGRGGDRGGFRGGRGMDRGGFGGGRRGG	221..278	2	10	{'D': 4, 'P': 2, 'M': 4, 'L': 1, 'F': 3}	18.2965	2.38462	53.4483	22.4138	24.1379
	GGRRGGRGG	291..299	0	2	{}	2.83912	2	66.6667	33.3333	0
>NP_061856.1 H/ACA ribonucleoprotein complex subunit 1 [Homo sapiens]	FRGGGRGGFNRGGGGGGFNRGGSSNHFRGGGGGGGGGNFRGGGRGGFGRGGGRGG	3..57	0	9	{'F': 6, 'N': 4, 'S': 2, 'H': 1}	25.3456	3.66667	60	16.3636	23.6364	2
	PRGGGRGGRGGGRGGGGRGGGRGGGFRGGRGGGGGGFRGGRGGGFRGRG	168..216	2	10	{'P': 1, 'F': 3}	22.5806	2.75	67.3469	24.4898	8.16327
>NP_127460.1 H/ACA ribonucleoprotein complex subunit 1 [Homo sapiens]	FRGGGRGGFNRGGGGGGFNRGGSSNHFRGGGGGGGGGNFRGGGRGGFGRGGGRGG	3..57	0	9	{'F': 6, 'N': 4, 'S': 2, 'H': 1}	25.3456	3.66667	60	16.3636	23.6364
	PRGGGRGGRGGGRGGGGRGGGRGGGFRGGRGGGGGGFRGGRGGGFRGRG	168..216	2	10	{'P': 1, 'F': 3}	22.5806	2.75	67.3469	24.4898	8.16327
>NP_001427.2 rRNA 2'-O-methyltransferase fibrillarin [Homo sapiens]	PRGGGFGGRGGFGDRGGRGGRGGFGGGRGRGGGFRGRGRGGGGGGGGGGGGGRGGGGFHSGGNRGRGRGGKRG	7..79	6	9	{'P': 1, 'F': 5, 'D': 1, 'H': 1, 'S': 1, 'N': 1, 'K': 1}	22.7414	3.13333	64.3836	20.5479	15.0685	1
>XP_005258708.1 rRNA 2'-O-methyltransferase fibrillarin isoform X1 [Homo sapiens]	PRGGGFGGRGGFGDRGGRGGRGGFGGGRGRGGGFRGRGRGGGGGGGGGGGGGRGGGFHSGGNRGRGRGGKRG	7..78	6	9	{'P': 1, 'F': 5, 'D': 1, 'H': 1, 'S': 1, 'N': 1, 'K': 1}	22.5	3.06667	63.8889	20.8333	15.2778	1
>NP_005372.2 nucleolin [Homo sapiens]	GGRGGGRGGFGGRGGGRGGRGGFGGRGRGGFGGRGGFRGGRGG	654..696	1	9	{'F': 4}	6.05634	2.9	67.4419	23.2558	9.30233	1
>NP_001107565.1 protein LSM14 homolog A isoform a [Homo sapiens]	RRGRGGHRGGRG	269..280	2	2	{'H': 1}	2.59179	1.2	50	41.6667	8.33333	24
	NRGRGGYRGRGGLGFRGGRGRGGGRGGTFTAPRGFRGGFRGGRGG	403..447	4	8	{'N': 1, 'Y': 1, 'L': 1, 'F': 4, 'T': 2, 'A': 1, 'P': 1}	9.71922	1.83333	48.8889	26.6667	24.4444
>NP_001371349.1 protein LSM14 homolog A isoform c [Homo sapiens]	RRGRGGHRGGRG	269..280	2	2	{'H': 1}	2.5641	1.2	50	41.6667	8.33333
	NRGRGGYRGRGGLGFRGGRGRGGGRGGTFTAPRGFRGGFRGGRGG	403..447	4	8	{'N': 1, 'Y': 1, 'L': 1, 'F': 4, 'T': 2, 'A': 1, 'P': 1}	9.61538	1.83333	48.8889	26.6667	24.4444
>NP_001371350.1 protein LSM14 homolog A isoform d [Homo sapiens]	RRGRGGHRGGRG	267..278	2	2	{'H': 1}	2.60304	1.2	50	41.6667	8.33333
	NRGRGGYRGRGGLGFRGGRGRGGGRGGTFTAPRGFRGGFRGGRGG	401..445	4	8	{'N': 1, 'Y': 1, 'L': 1, 'F': 4, 'T': 2, 'A': 1, 'P': 1}	9.76139	1.83333	48.8889	26.6667	24.4444
>NP_001371351.1 protein LSM14 homolog A isoform e [Homo sapiens]	RRGRGGHRGGRG	258..269	2	2	{'H': 1}	2.65487	1.2	50	41.6667	8.33333
	NRGRGGYRGRGGLGFRGGRGRGGGRGGTFTAPRGFRGGFRGGRGG	392..436	4	8	{'N': 1, 'Y': 1, 'L': 1, 'F': 4, 'T': 2, 'A': 1, 'P': 1}	9.95575	1.83333	48.8889	26.6667	24.4444
>NP_001371352.1 protein LSM14 homolog A isoform f [Homo sapiens]	RRGRGGHRGGRG	228..239	2	2	{'H': 1}	2.8436	1.2	50	41.6667	8.33333
	NRGRGGYRGRGGLGFRGGRGRGGGRGGTFTAPRGFRGGFRGGRGG	362..406	4	8	{'N': 1, 'Y': 1, 'L': 1, 'F': 4, 'T': 2, 'A': 1, 'P': 1}	10.6635	1.83333	48.8889	26.6667	24.4444
>NP_001371353.1 protein LSM14 homolog A isoform g [Homo sapiens]	RRGRGGHRGGRG	210..221	2	2	{'H': 1}	2.93399	1.2	50	41.6667	8.33333
	NRGRGGYRGRGGLGFRGGRGRGGGRGGTFTAPRGFRGGFRGGRGG	344..388	4	8	{'N': 1, 'Y': 1, 'L': 1, 'F': 4, 'T': 2, 'A': 1, 'P': 1}	11.0024	1.83333	48.8889	26.6667	24.4444
>NP_001371354.1 protein LSM14 homolog A isoform h [Homo sapiens]	RRGRGGHRGGRG	210..221	2	2	{'H': 1}	2.9703	1.2	50	41.6667	8.33333
	NRGRGGYRGRGGLGFRGGRGRGGGRGGTFTAPRGFRGGFRGGRGG	344..388	4	8	{'N': 1, 'Y': 1, 'L': 1, 'F': 4, 'T': 2, 'A': 1, 'P': 1}	11.1386	1.83333	48.8889	26.6667	24.4444
>NP_001371355.1 protein LSM14 homolog A isoform i [Homo sapiens]	RRGRGGHRGGRG	210..221	2	2	{'H': 1}	2.9703	1.2	50	41.6667	8.33333
	NRGRGGYRGRGGLGFRGGRGRGGGRGGTFTAPRGFRGGFRGGRGG	344..388	4	8	{'N': 1, 'Y': 1, 'L': 1, 'F': 4, 'T': 2, 'A': 1, 'P': 1}	11.1386	1.83333	48.8889	26.6667	24.4444
>NP_001371356.1 protein LSM14 homolog A isoform j [Homo sapiens]	NRGRGGYRGRGGLGFRGGRGRGGGRGGTFTAPRGFRGGFRGGRGG	342..386	4	8	{'N': 1, 'Y': 1, 'L': 1, 'F': 4, 'T': 2, 'A': 1, 'P': 1}	11.194	1.83333	48.8889	26.6667	24.4444
>NP_001371357.1 protein LSM14 homolog A isoform k [Homo sapiens]	NRGRGGYRGRGGLGFRGGRGRGGGRGGTFTAPRGFRGGFRGGRGG	342..386	4	8	{'N': 1, 'Y': 1, 'L': 1, 'F': 4, 'T': 2, 'A': 1, 'P': 1}	11.194	1.83333	48.8889	26.6667	24.4444
>NP_001371358.1 protein LSM14 homolog A isoform l [Homo sapiens]	RRGRGGHRGGRG	188..199	2	2	{'H': 1}	3.14136	1.2	50	41.6667	8.33333
	NRGRGGYRGRGGLGFRGGRGRGGGRGGTFTAPRGFRGGFRGGRGG	322..366	4	8	{'N': 1, 'Y': 1, 'L': 1, 'F': 4, 'T': 2, 'A': 1, 'P': 1}	11.7801	1.83333	48.8889	26.6667	24.4444
>NP_001371359.1 protein LSM14 homolog A isoform m [Homo sapiens]	RRGRGGHRGGRG	175..186	2	2	{'H': 1}	3.25203	1.2	50	41.6667	8.33333
	NRGRGGYRGRGGLGFRGGRGRGGGRGGTFTAPRGFRGGFRGGRGG	309..353	4	8	{'N': 1, 'Y': 1, 'L': 1, 'F': 4, 'T': 2, 'A': 1, 'P': 1}	12.1951	1.83333	48.8889	26.6667	24.4444
>NP_001371360.1 protein LSM14 homolog A isoform n [Homo sapiens]	RRGRGGHRGGRG	162..173	2	2	{'H': 1}	3.37079	1.2	50	41.6667	8.33333
	NRGRGGYRGRGGLGFRGGRGRGGGRGGTFTAPRGFRGGFRGGRGG	296..340	4	8	{'N': 1, 'Y': 1, 'L': 1, 'F': 4, 'T': 2, 'A': 1, 'P': 1}	12.6404	1.83333	48.8889	26.6667	24.4444
>NP_001371361.1 protein LSM14 homolog A isoform o [Homo sapiens]	RRGRGGHRGGRG	162..173	2	2	{'H': 1}	3.37079	1.2	50	41.6667	8.33333
	NRGRGGYRGRGGLGFRGGRGRGGGRGGTFTAPRGFRGGFRGGRGG	296..340	4	8	{'N': 1, 'Y': 1, 'L': 1, 'F': 4, 'T': 2, 'A': 1, 'P': 1}	12.6404	1.83333	48.8889	26.6667	24.4444
>NP_001371362.1 protein LSM14 homolog A isoform o [Homo sapiens]	RRGRGGHRGGRG	162..173	2	2	{'H': 1}	3.37079	1.2	50	41.6667	8.33333
	NRGRGGYRGRGGLGFRGGRGRGGGRGGTFTAPRGFRGGFRGGRGG	296..340	4	8	{'N': 1, 'Y': 1, 'L': 1, 'F': 4, 'T': 2, 'A': 1, 'P': 1}	12.6404	1.83333	48.8889	26.6667	24.4444
>NP_001371363.1 protein LSM14 homolog A isoform o [Homo sapiens]	RRGRGGHRGGRG	162..173	2	2	{'H': 1}	3.37079	1.2	50	41.6667	8.33333
	NRGRGGYRGRGGLGFRGGRGRGGGRGGTFTAPRGFRGGFRGGRGG	296..340	4	8	{'N': 1, 'Y': 1, 'L': 1, 'F': 4, 'T': 2, 'A': 1, 'P': 1}	12.6404	1.83333	48.8889	26.6667	24.4444
>NP_001371364.1 protein LSM14 homolog A isoform p [Homo sapiens]	NRGRGGYRGRGGLGFRGGRGRGGGRGGTFTAPRGFRGGFRGGRGG	283..327	4	8	{'N': 1, 'Y': 1, 'L': 1, 'F': 4, 'T': 2, 'A': 1, 'P': 1}	13.1195	1.83333	48.8889	26.6667	24.4444
>NP_001371365.1 protein LSM14 homolog A isoform q [Homo sapiens]	NRGRGGYRGRGGLGFRGGRGRGGGRGGTFTAPRGFRGGFRGGRGG	283..327	4	8	{'N': 1, 'Y': 1, 'L': 1, 'F': 4, 'T': 2, 'A': 1, 'P': 1}	13.1195	1.83333	48.8889	26.6667	24.4444
>NP_001371366.1 protein LSM14 homolog A isoform r [Homo sapiens]	NRGRGGYRGRGGLGFRGGRGRGGGRGGTFTAPRGFRGGFRGGRGG	235..279	4	8	{'N': 1, 'Y': 1, 'L': 1, 'F': 4, 'T': 2, 'A': 1, 'P': 1}	15.2542	1.83333	48.8889	26.6667	24.4444
>NP_056393.2 protein LSM14 homolog A isoform b [Homo sapiens]	RRGRGGHRGGRG	269..280	2	2	{'H': 1}	2.59179	1.2	50	41.6667	8.33333
	NRGRGGYRGRGGLGFRGGRGRGGGRGGTFTAPRGFRGGFRGGRGG	403..447	4	8	{'N': 1, 'Y': 1, 'L': 1, 'F': 4, 'T': 2, 'A': 1, 'P': 1}	9.71922	1.83333	48.8889	26.6667	24.4444
>XP_005258776.1 protein LSM14 homolog A isoform X1 [Homo sapiens]	RRGRGGHRGGRG	269..280	2	2	{'H': 1}	2.46407	1.2	50	41.6667	8.33333
	NRGRGGYRGRGGLGFRGGRGRGGGRGGTFTAPRGFRGGFRGGRGG	403..447	4	8	{'N': 1, 'Y': 1, 'L': 1, 'F': 4, 'T': 2, 'A': 1, 'P': 1}	9.24025	1.83333	48.8889	26.6667	24.4444
>XP_005258777.1 protein LSM14 homolog A isoform X2 [Homo sapiens]	RRGRGGHRGGRG	210..221	2	2	{'H': 1}	2.80374	1.2	50	41.6667	8.33333
	NRGRGGYRGRGGLGFRGGRGRGGGRGGTFTAPRGFRGGFRGGRGG	344..388	4	8	{'N': 1, 'Y': 1, 'L': 1, 'F': 4, 'T': 2, 'A': 1, 'P': 1}	10.514	1.83333	48.8889	26.6667	24.4444
>XP_005258778.1 protein LSM14 homolog A isoform X3 [Homo sapiens]	NRGRGGYRGRGGLGFRGGRGRGGGRGGTFTAPRGFRGGFRGGRGG	342..386	4	8	{'N': 1, 'Y': 1, 'L': 1, 'F': 4, 'T': 2, 'A': 1, 'P': 1}	10.5634	1.83333	48.8889	26.6667	24.4444
>XP_011525010.1 protein LSM14 homolog A isoform X7 [Homo sapiens]	NRGRGGYRGRGGLGFRGGRGRGGGRGGTFTAPRGFRGGFRGGRGG	283..327	4	8	{'N': 1, 'Y': 1, 'L': 1, 'F': 4, 'T': 2, 'A': 1, 'P': 1}	12.2616	1.83333	48.8889	26.6667	24.4444
